# Supplementary material for: Hypertensive Heart Disease Attributable to High BMI: Global Trends, Gender Disparities, and SDI-Based Inequities (1990–2021)
Source: Research Square preprint supplement (doi:10.21203/rs.3.rs-7342255/v1), 2025-08-14
Supplement: Supplementary file 1 [file 27a939dc2669691d6ca73486.docx]

**Hypertensive Heart Disease Attributable to High BMI: Global Trends, Gender Disparities, and SDI-Based Inequities (1990****–2021)**

Yukang Mao1†, Yiming Zhou1†, Minshan Zhong1†, Yuxuan Lou1, Yang Hua1, Xiaoguang Wu1, Yifeng Wang1, Yifeng Wang1, Huayiyang Zou1, Jing Shi1, Yanhui Sheng1, Xiangqing Kong1*, Wei Sun1*, Tingting Wu1*

1Department of Cardiology, The First Affiliated Hospital with Nanjing Medical University, Nanjing 210029, China

†These authors have contributed equally to this work

***Correspondence**

Tingting Wu, M.D., Department of Cardiology, The First Affiliated Hospital with Nanjing Medical University, Nanjing, 210029, China; Email: [wutingting@jsph.org.cn](mailto:wutingting@jsph.org.cn)

Wei Sun, M.D., Ph.D., Department of Cardiology, The First Affiliated Hospital with Nanjing Medical University, Nanjing, 210029, China; Email: [weisun7919@njmu.edu.cn](mailto:weisun7919@njmu.edu.cn)

Xiangqing Kong, M.D., Ph.D., Department of Cardiology, The First Affiliated Hospital with Nanjing Medical University, Nanjing, 210029, China; Email: kongxq@njmu.edu.cn

**Table S1. Instrumental SNPs for BMI obtained from GIANT.**

| SNP | CHR | POS | Effect allele | Other allele | EAF | Beta | SE | *P*-value | R2 | F-statistic |
| --- | --- | --- | --- | --- | --- | --- | --- | --- | --- | --- |
| rs10132280 | 14 | 25928179 | A | C | 0.3017 | -0.0223 | 0.0018 | 5.6E-35 | 1.95E-04 | 153.484 |
| rs10169594 | 2 | 41637688 | C | T | 0.3596 | 0.0121 | 0.0018 | 2.0E-11 | 6.59E-05 | 45.188 |
| rs10182181 | 2 | 25150296 | G | A | 0.4753 | 0.0325 | 0.0016 | 6.7E-90 | 5.21E-04 | 412.597 |
| rs10192119 | 2 | 164581241 | G | T | 0.1673 | 0.0166 | 0.0022 | 3.0E-14 | 7.16E-05 | 56.934 |
| rs10197031 | 2 | 105454590 | C | T | 0.2834 | 0.0166 | 0.0019 | 1.9E-18 | 1.10E-04 | 76.332 |
| rs10211055 | 2 | 229016917 | C | T | 0.3456 | 0.0157 | 0.0018 | 7.2E-18 | 1.11E-04 | 76.077 |
| rs10247983 | 7 | 114590228 | A | G | 0.9213 | 0.0201 | 0.0033 | 1.7E-09 | 5.52E-05 | 37.099 |
| rs10248136 | 7 | 39077397 | T | C | 0.5142 | -0.0097 | 0.0017 | 2.0E-08 | 4.74E-05 | 32.557 |
| rs10259786 | 7 | 39444551 | G | A | 0.3537 | -0.0114 | 0.0018 | 4.1E-10 | 5.82E-05 | 40.111 |
| rs10269783 | 7 | 49616203 | A | G | 0.3896 | 0.0133 | 0.0017 | 1.4E-15 | 7.74E-05 | 61.207 |
| rs10408324 | 19 | 51774806 | T | C | 0.2744 | -0.0124 | 0.0019 | 9.5E-11 | 6.17E-05 | 42.593 |
| rs10478110 | 5 | 112445734 | C | A | 0.4348 | 0.01 | 0.0017 | 9.6E-09 | 5.08E-05 | 34.602 |
| rs1048932 | 11 | 115044850 | A | C | 0.4162 | -0.016 | 0.0017 | 3.8E-22 | 1.11E-04 | 88.581 |
| rs10492229 | 12 | 110602173 | T | C | 0.2268 | 0.0142 | 0.0019 | 7.7E-14 | 7.03E-05 | 55.856 |
| rs10510419 | 3 | 12426936 | T | G | 0.1416 | -0.0177 | 0.0023 | 2.2E-14 | 7.50E-05 | 59.223 |
| rs10518694 | 15 | 53072673 | A | C | 0.1424 | 0.0146 | 0.0025 | 3.3E-09 | 4.94E-05 | 34.106 |
| rs1064213 | 2 | 198950240 | A | G | 0.492 | 0.012 | 0.0017 | 2.4E-12 | 7.19E-05 | 49.827 |
| rs10733051 | 1 | 167280354 | G | A | 0.4802 | -0.0097 | 0.0016 | 2.9E-09 | 4.70E-05 | 36.754 |
| rs10741329 | 11 | 89997796 | A | G | 0.681 | 0.011 | 0.0019 | 4.0E-09 | 4.86E-05 | 33.518 |
| rs10742752 | 11 | 45438374 | C | T | 0.6159 | 0.0124 | 0.0017 | 1.1E-13 | 6.71E-05 | 53.204 |
| rs10747488 | 1 | 98299475 | A | C | 0.7601 | -0.0123 | 0.002 | 1.2E-09 | 5.49E-05 | 37.822 |
| rs10750215 | 11 | 122505344 | T | G | 0.3883 | 0.0108 | 0.0017 | 1.3E-10 | 5.12E-05 | 40.36 |
| rs1075901 | 17 | 15943910 | C | T | 0.5639 | 0.0121 | 0.0016 | 1.2E-13 | 7.20E-05 | 57.191 |
| rs10768994 | 11 | 43936945 | C | T | 0.4337 | -0.0114 | 0.0017 | 6.4E-12 | 5.68E-05 | 44.969 |
| rs10795422 | 10 | 16759312 | G | A | 0.6905 | 0.0139 | 0.0019 | 9.3E-14 | 7.73E-05 | 53.521 |
| rs10811871 | 9 | 23200766 | G | A | 0.3829 | -0.0108 | 0.0018 | 1.6E-09 | 5.24E-05 | 36 |
| rs10827649 | 10 | 19909770 | G | A | 0.4277 | 0.0094 | 0.0016 | 9.1E-09 | 4.37E-05 | 34.516 |
| rs10858334 | 9 | 137989785 | G | C | 0.1415 | 0.0143 | 0.0026 | 2.7E-08 | 4.50E-05 | 30.25 |
| rs10867256 | 9 | 81367391 | T | C | 0.553 | -0.0118 | 0.0017 | 8.7E-12 | 6.99E-05 | 48.18 |
| rs10878946 | 12 | 69642315 | T | C | 0.714 | -0.0141 | 0.0019 | 3.6E-13 | 8.03E-05 | 55.072 |
| rs10915840 | 1 | 225668524 | A | G | 0.283 | -0.0118 | 0.0019 | 1.3E-09 | 5.63E-05 | 38.571 |
| rs10920678 | 1 | 190239907 | G | A | 0.5709 | -0.0155 | 0.0016 | 1.5E-21 | 1.19E-04 | 93.847 |
| rs10938397 | 4 | 45182527 | G | A | 0.4317 | 0.0324 | 0.0016 | 3.4E-86 | 5.16E-04 | 410.061 |
| rs10942267 | 5 | 80841914 | G | A | 0.3088 | -0.0156 | 0.0019 | 3.9E-17 | 9.78E-05 | 67.413 |
| rs10953740 | 7 | 113460282 | G | A | 0.5534 | -0.0153 | 0.0017 | 1.0E-18 | 1.18E-04 | 81 |
| rs10962550 | 9 | 16720329 | C | G | 0.1801 | 0.0182 | 0.0022 | 6.2E-16 | 9.91E-05 | 68.438 |
| rs10968114 | 9 | 27800007 | C | A | 0.4681 | -0.0113 | 0.0017 | 6.1E-11 | 6.44E-05 | 44.183 |
| rs10971709 | 9 | 33804813 | T | C | 0.2062 | 0.0132 | 0.0021 | 6.2E-10 | 5.74E-05 | 39.51 |
| rs10984756 | 9 | 122651784 | G | C | 0.1048 | 0.0174 | 0.0029 | 1.1E-09 | 5.22E-05 | 36 |
| rs11030618 | 11 | 29243293 | T | C | 0.5679 | 0.011 | 0.0017 | 2.4E-10 | 6.07E-05 | 41.868 |
| rs11066188 | 12 | 112610714 | A | G | 0.4181 | -0.012 | 0.0017 | 8.1E-13 | 6.28E-05 | 49.827 |
| rs11084553 | 19 | 31019780 | G | A | 0.1518 | -0.021 | 0.0024 | 1.8E-18 | 1.11E-04 | 76.562 |
| rs11105839 | 12 | 91237920 | A | T | 0.3799 | -0.0109 | 0.0017 | 1.1E-10 | 5.26E-05 | 41.111 |
| rs11115176 | 12 | 82465797 | C | T | 0.2399 | -0.0121 | 0.0019 | 2.0E-10 | 5.12E-05 | 40.557 |
| rs11118308 | 1 | 219633869 | G | A | 0.4703 | -0.0101 | 0.0016 | 4.8E-10 | 5.01E-05 | 39.848 |
| rs1112613 | 13 | 53651850 | A | G | 0.1762 | -0.0133 | 0.0023 | 3.4E-09 | 4.90E-05 | 33.438 |
| rs11150911 | 18 | 73498528 | C | A | 0.7191 | -0.0133 | 0.0018 | 4.7E-13 | 6.98E-05 | 54.596 |
| rs11165643 | 1 | 96924097 | T | C | 0.5828 | 0.0206 | 0.0017 | 1.4E-35 | 1.85E-04 | 146.837 |
| rs11170468 | 12 | 39430048 | C | A | 0.2326 | -0.0123 | 0.0019 | 1.9E-10 | 5.27E-05 | 41.908 |
| rs11173522 | 12 | 60953472 | A | C | 0.2078 | 0.0128 | 0.0021 | 1.1E-09 | 5.37E-05 | 37.152 |
| rs11185111 | 1 | 107962328 | A | G | 0.3042 | -0.0129 | 0.0019 | 7.7E-12 | 6.71E-05 | 46.097 |
| rs11251352 | 10 | 2585792 | G | A | 0.5988 | 0.0109 | 0.0018 | 7.0E-10 | 5.31E-05 | 36.67 |
| rs11496125 | 7 | 103417557 | T | C | 0.4212 | 0.0169 | 0.0017 | 3.0E-22 | 1.44E-04 | 98.827 |
| rs11505821 | 7 | 76818677 | T | A | 0.0601 | 0.0311 | 0.0035 | 2.7E-19 | 1.04E-04 | 78.956 |
| rs1150659 | 6 | 26100023 | A | G | 0.2254 | -0.0139 | 0.0019 | 3.8E-13 | 6.77E-05 | 53.521 |
| rs11538 | 22 | 18220831 | G | A | 0.1805 | 0.0135 | 0.0023 | 3.3E-09 | 4.98E-05 | 34.452 |
| rs11577094 | 1 | 38026600 | T | C | 0.08109 | 0.0182 | 0.003 | 6.9E-10 | 4.72E-05 | 36.804 |
| rs1158805 | 18 | 40736590 | A | C | 0.3766 | -0.0137 | 0.0018 | 1.2E-14 | 8.37E-05 | 57.929 |
| rs11609659 | 12 | 108296260 | C | T | 0.2371 | -0.0154 | 0.002 | 2.2E-14 | 8.73E-05 | 59.29 |
| rs11611246 | 12 | 939480 | T | G | 0.21 | 0.024 | 0.002 | 5.0E-32 | 1.85E-04 | 144 |
| rs11615578 | 12 | 121714935 | T | C | 0.2474 | 0.013 | 0.002 | 8.1E-11 | 6.31E-05 | 42.25 |
| rs11656076 | 17 | 31464270 | A | G | 0.2254 | -0.0142 | 0.0021 | 5.6E-12 | 6.61E-05 | 45.723 |
| rs11672660 | 19 | 46180184 | T | C | 0.2049 | -0.034 | 0.0021 | 1.7E-60 | 3.41E-04 | 262.131 |
| rs11713193 | 3 | 49924424 | A | G | 0.5073 | 0.0239 | 0.0017 | 2.4E-44 | 2.85E-04 | 197.65 |
| rs11736228 | 4 | 147376805 | T | A | 0.2587 | -0.0139 | 0.002 | 4.1E-12 | 6.98E-05 | 48.302 |
| rs11738695 | 5 | 108699161 | A | C | 0.586 | 0.0097 | 0.0017 | 2.0E-08 | 4.71E-05 | 32.557 |
| rs11739877 | 5 | 105876806 | T | C | 0.6118 | 0.0117 | 0.0018 | 6.6E-11 | 6.10E-05 | 42.25 |
| rs11773362 | 7 | 147668180 | T | C | 0.3369 | -0.0111 | 0.0018 | 1.5E-09 | 5.51E-05 | 38.028 |
| rs11781699 | 8 | 118863061 | C | T | 0.1896 | 0.0132 | 0.0021 | 3.1E-10 | 5.04E-05 | 39.51 |
| rs11856579 | 15 | 78012688 | A | G | 0.2654 | -0.0141 | 0.002 | 8.0E-13 | 7.30E-05 | 49.702 |
| rs1187352 | 9 | 87293457 | C | T | 0.6518 | 0.0119 | 0.0018 | 6.0E-11 | 6.35E-05 | 43.707 |
| rs1188017 | 11 | 63824364 | T | C | 0.1954 | -0.0142 | 0.0021 | 1.2E-11 | 5.94E-05 | 45.723 |
| rs11880870 | 19 | 18830704 | G | A | 0.4801 | -0.0189 | 0.0017 | 1.0E-28 | 1.72E-04 | 123.602 |
| rs11889536 | 2 | 220163543 | G | A | 0.1493 | -0.0189 | 0.0024 | 6.4E-15 | 9.00E-05 | 62.015 |
| rs11908637 | 20 | 47428485 | A | G | 0.236 | -0.012 | 0.0021 | 4.9E-09 | 4.72E-05 | 32.653 |
| rs11945861 | 4 | 65700865 | A | G | 0.2369 | -0.0148 | 0.002 | 5.0E-13 | 8.02E-05 | 54.76 |
| rs11951673 | 5 | 95861012 | T | C | 0.3941 | -0.0123 | 0.0017 | 1.1E-13 | 6.61E-05 | 52.349 |
| rs12041258 | 1 | 195047936 | C | T | 0.2287 | -0.0146 | 0.002 | 9.5E-13 | 7.74E-05 | 53.29 |
| rs12044597 | 1 | 1708801 | G | A | 0.5029 | 0.0143 | 0.0016 | 1.7E-18 | 1.01E-04 | 79.879 |
| rs12049202 | 1 | 77967523 | T | C | 0.203 | 0.024 | 0.0022 | 1.0E-28 | 1.72E-04 | 119.008 |
| rs12098284 | 10 | 76047464 | T | C | 0.1241 | 0.0178 | 0.0026 | 1.8E-11 | 6.83E-05 | 46.87 |
| rs12150665 | 17 | 34914787 | C | T | 0.4058 | -0.0162 | 0.0017 | 1.6E-22 | 1.14E-04 | 90.809 |
| rs1218822 | 13 | 28011963 | A | G | 0.6663 | 0.0168 | 0.0017 | 1.9E-22 | 1.23E-04 | 97.661 |
| rs12299814 | 12 | 90216146 | A | C | 0.2525 | -0.0157 | 0.002 | 5.2E-15 | 8.96E-05 | 61.622 |
| rs12328930 | 2 | 175079125 | C | T | 0.4235 | 0.0098 | 0.0017 | 1.8E-08 | 4.81E-05 | 33.232 |
| rs12334877 | 8 | 67194171 | A | G | 0.198 | -0.0144 | 0.0022 | 7.7E-11 | 6.26E-05 | 42.843 |
| rs12364470 | 11 | 134601012 | G | T | 0.1626 | 0.0178 | 0.0022 | 1.1E-15 | 8.31E-05 | 65.463 |
| rs12369179 | 12 | 122963550 | T | C | 0.08782 | -0.0359 | 0.0031 | 2.5E-31 | 1.99E-04 | 134.111 |
| rs12416812 | 11 | 888632 | A | G | 0.5088 | 0.0111 | 0.0016 | 6.1E-12 | 6.07E-05 | 48.129 |
| rs1241986 | 18 | 6873954 | A | G | 0.8479 | -0.0139 | 0.0024 | 1.1E-08 | 4.88E-05 | 33.543 |
| rs12422552 | 12 | 14413931 | C | G | 0.2663 | -0.0134 | 0.002 | 1.6E-11 | 6.51E-05 | 44.89 |
| rs12429545 | 13 | 54102206 | A | G | 0.1248 | 0.0316 | 0.0025 | 9.6E-38 | 2.05E-04 | 159.769 |
| rs12448257 | 16 | 3599655 | A | G | 0.218 | 0.0184 | 0.002 | 8.1E-20 | 1.09E-04 | 84.64 |
| rs12564992 | 1 | 174478100 | G | A | 0.1144 | 0.0196 | 0.0026 | 5.3E-14 | 7.15E-05 | 56.828 |
| rs12593036 | 15 | 81058652 | G | A | 0.2993 | -0.0154 | 0.0019 | 3.8E-16 | 9.57E-05 | 65.695 |
| rs12602912 | 17 | 65870073 | T | C | 0.2048 | 0.0176 | 0.0021 | 9.9E-18 | 9.03E-05 | 70.24 |
| rs1260326 | 2 | 27730940 | C | T | 0.5973 | 0.0105 | 0.0017 | 3.9E-10 | 4.86E-05 | 38.149 |
| rs12629015 | 3 | 119618053 | G | A | 0.1852 | -0.0135 | 0.0023 | 2.1E-09 | 4.99E-05 | 34.452 |
| rs12652212 | 5 | 88808594 | G | A | 0.4214 | 0.0123 | 0.0017 | 9.7E-14 | 6.58E-05 | 52.349 |
| rs1266874 | 6 | 51779638 | G | A | 0.3558 | 0.014 | 0.0018 | 9.8E-15 | 8.75E-05 | 60.494 |
| rs12675063 | 8 | 132879047 | T | A | 0.1131 | 0.0156 | 0.0026 | 1.3E-09 | 4.56E-05 | 36 |
| rs1268065 | 6 | 126042783 | A | G | 0.4794 | -0.0102 | 0.0017 | 1.0E-09 | 4.74E-05 | 36 |
| rs12680842 | 8 | 95582606 | G | A | 0.3205 | -0.0133 | 0.0018 | 4.4E-14 | 6.98E-05 | 54.596 |
| rs12718572 | 7 | 50573325 | T | C | 0.4024 | -0.0117 | 0.0018 | 3.0E-11 | 6.15E-05 | 42.25 |
| rs12762034 | 10 | 33969931 | C | T | 0.07583 | 0.024 | 0.0032 | 7.3E-14 | 8.13E-05 | 56.25 |
| rs12779328 | 10 | 12943973 | T | C | 0.2833 | 0.0105 | 0.0019 | 4.5E-08 | 4.42E-05 | 30.54 |
| rs1285997 | 14 | 91513029 | G | C | 0.7153 | 0.0142 | 0.0019 | 1.2E-13 | 8.16E-05 | 55.856 |
| rs12888545 | 14 | 88308044 | G | A | 0.2519 | 0.0136 | 0.002 | 9.1E-12 | 6.71E-05 | 46.24 |
| rs12888955 | 14 | 103256877 | A | G | 0.6513 | -0.0178 | 0.0018 | 1.4E-22 | 1.41E-04 | 97.79 |
| rs12905439 | 15 | 99521883 | G | C | 0.3393 | -0.0118 | 0.0018 | 1.4E-10 | 6.36E-05 | 42.975 |
| rs12922346 | 16 | 82438337 | C | G | 0.2657 | 0.0136 | 0.002 | 1.0E-11 | 6.80E-05 | 46.24 |
| rs12932660 | 16 | 6702631 | T | C | 0.7391 | 0.0127 | 0.0019 | 5.4E-11 | 6.47E-05 | 44.679 |
| rs12933482 | 16 | 72189604 | G | A | 0.1048 | 0.0186 | 0.0028 | 4.9E-11 | 6.38E-05 | 44.127 |
| rs12936083 | 17 | 4801887 | G | A | 0.3267 | 0.0139 | 0.0019 | 4.1E-13 | 8.45E-05 | 53.521 |
| rs12939549 | 17 | 78611724 | G | A | 0.4335 | -0.018 | 0.0016 | 2.7E-28 | 1.59E-04 | 126.562 |
| rs1296328 | 4 | 137083193 | C | A | 0.5657 | -0.0179 | 0.0018 | 4.9E-24 | 1.45E-04 | 98.892 |
| rs12981256 | 19 | 1865901 | A | G | 0.5325 | 0.0142 | 0.0018 | 1.1E-15 | 9.17E-05 | 62.234 |
| rs13021737 | 2 | 632348 | G | A | 0.8319 | 0.0574 | 0.0021 | 7.5E-157 | 9.45E-04 | 747.109 |
| rs13069244 | 3 | 180441172 | A | G | 0.07747 | 0.0187 | 0.0032 | 3.0E-09 | 4.32E-05 | 34.149 |
| rs13107325 | 4 | 103188709 | T | C | 0.07373 | 0.047 | 0.0032 | 1.1E-47 | 2.72E-04 | 215.722 |
| rs13110266 | 4 | 162129844 | A | G | 0.4065 | -0.0117 | 0.0017 | 1.9E-12 | 5.99E-05 | 47.367 |
| rs13147390 | 4 | 80712000 | C | T | 0.3569 | 0.0103 | 0.0018 | 1.0E-08 | 4.81E-05 | 32.744 |
| rs13174863 | 5 | 139080745 | G | A | 0.1548 | 0.0192 | 0.0023 | 2.9E-16 | 9.01E-05 | 69.686 |
| rs13184896 | 5 | 122734005 | T | G | 0.4346 | -0.0133 | 0.0016 | 3.3E-16 | 8.69E-05 | 69.097 |
| rs13191362 | 6 | 163033350 | G | A | 0.1198 | -0.0236 | 0.0025 | 5.9E-21 | 1.12E-04 | 89.113 |
| rs1320903 | 3 | 131758077 | A | G | 0.3174 | 0.0216 | 0.0018 | 9.2E-32 | 2.08E-04 | 144 |
| rs1321432 | 20 | 6614691 | C | A | 0.6321 | 0.0201 | 0.0018 | 3.5E-29 | 1.82E-04 | 124.694 |
| rs13250058 | 8 | 112270826 | T | G | 0.6771 | 0.0112 | 0.0018 | 2.9E-10 | 4.91E-05 | 38.716 |
| rs13263601 | 8 | 14095900 | C | A | 0.3478 | 0.0154 | 0.0018 | 2.2E-17 | 1.07E-04 | 73.197 |
| rs1327259 | 6 | 51177811 | G | A | 0.3872 | -0.0155 | 0.0018 | 1.7E-18 | 1.08E-04 | 74.151 |
| rs13287131 | 9 | 92119579 | C | T | 0.2491 | 0.0123 | 0.002 | 6.8E-10 | 5.53E-05 | 37.822 |
| rs13329567 | 15 | 68104367 | T | C | 0.2308 | -0.0293 | 0.002 | 1.0E-50 | 2.70E-04 | 214.622 |
| rs1365466 | 18 | 36182440 | T | C | 0.7406 | -0.0137 | 0.0019 | 3.3E-13 | 6.57E-05 | 51.992 |
| rs1371108 | 2 | 81816251 | A | C | 0.3247 | 0.0119 | 0.0018 | 9.0E-11 | 6.38E-05 | 43.707 |
| rs1399896 | 3 | 161416468 | G | A | 0.5707 | 0.01 | 0.0017 | 5.8E-09 | 5.01E-05 | 34.602 |
| rs1409818 | 20 | 21381121 | T | C | 0.1156 | 0.0201 | 0.0029 | 2.5E-12 | 6.95E-05 | 48.039 |
| rs1412235 | 9 | 28410996 | C | G | 0.3175 | 0.0246 | 0.0017 | 6.0E-45 | 2.65E-04 | 209.397 |
| rs1421334 | 8 | 30865733 | C | A | 0.5431 | -0.0125 | 0.0018 | 1.0E-12 | 7.08E-05 | 48.225 |
| rs1430387 | 18 | 58227112 | C | T | 0.4295 | -0.0114 | 0.0017 | 5.8E-11 | 6.52E-05 | 44.969 |
| rs1431659 | 8 | 73439070 | G | A | 0.7344 | -0.0196 | 0.0019 | 6.0E-24 | 1.54E-04 | 106.415 |
| rs1436344 | 3 | 104606144 | C | G | 0.5922 | 0.0141 | 0.0017 | 4.1E-16 | 9.94E-05 | 68.792 |
| rs1445652 | 2 | 155668460 | A | G | 0.1855 | 0.0123 | 0.0022 | 4.3E-08 | 4.58E-05 | 31.258 |
| rs1452075 | 3 | 62481063 | T | C | 0.7277 | 0.0141 | 0.0018 | 1.3E-14 | 7.83E-05 | 61.361 |
| rs1465900 | 11 | 76473138 | C | A | 0.2188 | -0.0125 | 0.002 | 4.8E-10 | 5.01E-05 | 39.062 |
| rs1472169 | 9 | 37209396 | T | C | 0.3772 | -0.0139 | 0.0018 | 2.8E-15 | 8.64E-05 | 59.633 |
| rs1477199 | 16 | 53712135 | G | A | 0.1451 | 0.0228 | 0.0024 | 9.4E-22 | 1.14E-04 | 90.25 |
| rs1477887 | 4 | 18514827 | G | A | 0.5433 | 0.0138 | 0.0017 | 2.0E-15 | 9.70E-05 | 65.896 |
| rs1492767 | 4 | 55221467 | T | C | 0.4957 | 0.0094 | 0.0016 | 1.0E-08 | 4.35E-05 | 34.516 |
| rs1503526 | 5 | 63020706 | C | T | 0.4838 | 0.014 | 0.0017 | 5.5E-17 | 9.07E-05 | 67.82 |
| rs1522569 | 4 | 171632637 | G | T | 0.1819 | -0.0164 | 0.0022 | 2.9E-13 | 8.06E-05 | 55.57 |
| rs1528435 | 2 | 181550962 | T | C | 0.6331 | 0.0164 | 0.0017 | 9.1E-23 | 1.17E-04 | 93.066 |
| rs1535660 | 9 | 10371073 | C | T | 0.8554 | -0.0147 | 0.0025 | 5.2E-09 | 5.01E-05 | 34.574 |
| rs1538247 | 6 | 153395344 | C | T | 0.3181 | 0.0108 | 0.0019 | 1.0E-08 | 4.73E-05 | 32.31 |
| rs156201 | 6 | 104847441 | C | G | 0.7606 | 0.0123 | 0.002 | 5.8E-10 | 5.47E-05 | 37.822 |
| rs1579557 | 6 | 40371918 | T | C | 0.2998 | 0.0213 | 0.0019 | 1.1E-29 | 1.81E-04 | 125.676 |
| rs1656377 | 3 | 158285280 | C | T | 0.5885 | 0.0099 | 0.0017 | 1.6E-08 | 4.90E-05 | 33.913 |
| rs1681740 | 10 | 118564313 | C | A | 0.3933 | -0.0115 | 0.0018 | 1.1E-10 | 6.06E-05 | 40.818 |
| rs16822990 | 3 | 114319407 | G | A | 0.0801 | -0.0187 | 0.0032 | 3.8E-09 | 5.01E-05 | 34.149 |
| rs16849710 | 1 | 202106797 | G | A | 0.515 | -0.0116 | 0.0018 | 6.0E-11 | 6.23E-05 | 41.531 |
| rs16851483 | 3 | 141275436 | T | G | 0.06928 | 0.0369 | 0.0035 | 3.2E-26 | 1.61E-04 | 111.152 |
| rs16871902 | 5 | 3488462 | A | G | 0.4877 | 0.0125 | 0.0017 | 4.6E-13 | 7.83E-05 | 54.066 |
| rs16889835 | 6 | 24947772 | T | C | 0.1429 | -0.0145 | 0.0025 | 4.3E-09 | 4.93E-05 | 33.64 |
| rs16903285 | 5 | 87978252 | C | T | 0.1407 | 0.0331 | 0.0026 | 7.6E-38 | 2.36E-04 | 162.072 |
| rs17001561 | 4 | 77096118 | A | G | 0.1573 | 0.0151 | 0.0023 | 3.8E-11 | 5.43E-05 | 43.102 |
| rs17014375 | 1 | 209543560 | G | T | 0.1348 | 0.0172 | 0.0025 | 1.1E-11 | 6.85E-05 | 47.334 |
| rs17033117 | 3 | 35443653 | T | C | 0.1872 | 0.0137 | 0.0022 | 8.9E-10 | 5.60E-05 | 38.779 |
| rs17056301 | 5 | 158271680 | C | T | 0.2636 | 0.0118 | 0.002 | 2.4E-09 | 5.06E-05 | 34.81 |
| rs17113297 | 10 | 102395982 | T | C | 0.2082 | 0.0166 | 0.0021 | 2.1E-15 | 9.10E-05 | 62.485 |
| rs17119937 | 8 | 14502274 | C | T | 0.06905 | 0.0212 | 0.0036 | 5.6E-09 | 5.19E-05 | 34.679 |
| rs17203016 | 2 | 208255518 | G | A | 0.196 | 0.015 | 0.002 | 2.1E-13 | 7.15E-05 | 56.25 |
| rs17207196 | 7 | 75101065 | T | C | 0.4118 | -0.0221 | 0.0018 | 2.1E-35 | 2.25E-04 | 150.743 |
| rs17238110 | 15 | 62150364 | G | A | 0.1634 | -0.0353 | 0.005 | 2.0E-12 | 6.43E-05 | 49.843 |
| rs17311369 | 15 | 47709199 | T | C | 0.3278 | -0.0104 | 0.0019 | 3.1E-08 | 4.45E-05 | 29.961 |
| rs17399237 | 2 | 35471626 | C | T | 0.5497 | -0.0129 | 0.0017 | 6.7E-14 | 8.33E-05 | 57.581 |
| rs17405819 | 8 | 76806584 | C | T | 0.301 | -0.0215 | 0.0018 | 4.3E-33 | 1.79E-04 | 142.669 |
| rs17424296 | 5 | 60838903 | A | G | 0.3659 | -0.0108 | 0.0018 | 2.4E-09 | 5.26E-05 | 36 |
| rs17425707 | 1 | 57874879 | C | T | 0.1003 | 0.0167 | 0.0028 | 4.4E-09 | 5.16E-05 | 35.573 |
| rs17446257 | 13 | 40749213 | A | G | 0.1292 | 0.0153 | 0.0026 | 2.9E-09 | 5.01E-05 | 34.629 |
| rs17499593 | 2 | 172649755 | G | C | 0.1897 | 0.0125 | 0.0022 | 1.1E-08 | 4.67E-05 | 32.283 |
| rs17513613 | 19 | 30286822 | C | T | 0.3236 | 0.0186 | 0.0018 | 3.6E-26 | 1.35E-04 | 106.778 |
| rs175165 | 22 | 20116015 | G | T | 0.3941 | -0.0103 | 0.0018 | 5.2E-09 | 4.74E-05 | 32.744 |
| rs17535082 | 14 | 35667554 | T | C | 0.0939 | -0.0171 | 0.003 | 7.8E-09 | 4.70E-05 | 32.49 |
| rs17535749 | 3 | 10027724 | A | G | 0.1023 | 0.015 | 0.0027 | 2.5E-08 | 3.97E-05 | 30.864 |
| rs17551974 | 2 | 142293146 | A | C | 0.1782 | -0.0141 | 0.0022 | 1.9E-10 | 5.94E-05 | 41.076 |
| rs17636031 | 10 | 126594078 | C | T | 0.2701 | 0.016 | 0.0019 | 1.2E-17 | 9.06E-05 | 70.914 |
| rs17663412 | 5 | 167595121 | A | C | 0.1139 | 0.0157 | 0.0027 | 6.1E-09 | 4.89E-05 | 33.812 |
| rs17710386 | 18 | 63461201 | C | T | 0.3319 | 0.0126 | 0.0018 | 1.0E-12 | 6.25E-05 | 49 |
| rs17724992 | 19 | 18454825 | G | A | 0.2596 | -0.0183 | 0.0019 | 1.0E-22 | 1.18E-04 | 92.767 |
| rs17767510 | 4 | 68156598 | C | G | 0.1697 | 0.0129 | 0.0023 | 1.9E-08 | 4.60E-05 | 31.457 |
| rs17789218 | 6 | 100600097 | C | T | 0.2392 | 0.013 | 0.0019 | 7.4E-12 | 5.90E-05 | 46.814 |
| rs17806379 | 20 | 51107290 | T | C | 0.1789 | -0.0258 | 0.0022 | 1.5E-30 | 1.99E-04 | 137.529 |
| rs1784460 | 11 | 118938371 | A | T | 0.4035 | 0.0132 | 0.0018 | 9.0E-14 | 7.91E-05 | 53.778 |
| rs1804528 | 4 | 146056320 | A | G | 0.3507 | 0.0109 | 0.002 | 3.0E-08 | 5.72E-05 | 29.702 |
| rs1830074 | 7 | 6718674 | C | T | 0.288 | 0.0115 | 0.0019 | 1.4E-09 | 5.31E-05 | 36.634 |
| rs1836303 | 15 | 46539116 | G | A | 0.3873 | 0.0116 | 0.0018 | 5.3E-11 | 6.03E-05 | 41.531 |
| rs1863652 | 4 | 95991417 | A | G | 0.3449 | -0.0115 | 0.0018 | 1.4E-10 | 5.89E-05 | 40.818 |
| rs1884389 | 20 | 1410582 | T | C | 0.4289 | -0.0103 | 0.0017 | 4.0E-09 | 5.37E-05 | 36.709 |
| rs1885728 | 6 | 5977833 | A | G | 0.6787 | 0.0108 | 0.0019 | 1.0E-08 | 4.74E-05 | 32.31 |
| rs1891216 | 1 | 7728391 | G | T | 0.3759 | 0.0107 | 0.0018 | 2.4E-09 | 5.16E-05 | 35.336 |
| rs1896767 | 16 | 62838304 | A | G | 0.5376 | -0.0109 | 0.0017 | 2.4E-10 | 5.99E-05 | 41.111 |
| rs1927790 | 13 | 96922191 | C | T | 0.4109 | 0.0148 | 0.0016 | 1.8E-19 | 1.08E-04 | 85.562 |
| rs1928295 | 9 | 120378483 | C | T | 0.4461 | -0.0141 | 0.0016 | 5.4E-18 | 9.78E-05 | 77.66 |
| rs1937683 | 10 | 53679060 | T | C | 0.6699 | 0.0109 | 0.0018 | 3.2E-09 | 5.29E-05 | 36.67 |
| rs1948080 | 9 | 11852043 | G | T | 0.3749 | -0.0137 | 0.0018 | 1.1E-14 | 8.39E-05 | 57.929 |
| rs1982441 | 8 | 28021769 | T | G | 0.1381 | 0.0175 | 0.0026 | 7.0E-12 | 6.59E-05 | 45.303 |
| rs1982725 | 19 | 30618771 | T | C | 0.4778 | 0.0097 | 0.0017 | 3.3E-08 | 4.77E-05 | 32.557 |
| rs1993709 | 1 | 72838529 | G | A | 0.8177 | 0.0331 | 0.0021 | 1.9E-57 | 3.16E-04 | 248.437 |
| rs2007231 | 1 | 115266306 | T | C | 0.6387 | -0.0104 | 0.0018 | 5.2E-09 | 4.82E-05 | 33.383 |
| rs200810 | 6 | 97922184 | C | T | 0.3716 | -0.0136 | 0.0017 | 5.5E-16 | 8.06E-05 | 64 |
| rs2051559 | 4 | 3298800 | C | T | 0.1308 | 0.0176 | 0.0026 | 5.0E-12 | 6.65E-05 | 45.822 |
| rs2065418 | 11 | 30422068 | G | T | 0.3623 | -0.0166 | 0.0018 | 3.6E-20 | 1.23E-04 | 85.049 |
| rs208015 | 17 | 46252346 | C | T | 0.9216 | -0.0356 | 0.0034 | 1.4E-25 | 1.59E-04 | 109.633 |
| rs2124499 | 3 | 123093541 | C | G | 0.3718 | -0.0123 | 0.0017 | 3.4E-13 | 6.66E-05 | 52.349 |
| rs2143253 | 20 | 41987392 | A | G | 0.1189 | -0.0188 | 0.0026 | 1.1E-12 | 7.63E-05 | 52.284 |
| rs215634 | 7 | 32369148 | G | A | 0.6212 | -0.0152 | 0.0018 | 2.6E-17 | 1.05E-04 | 71.308 |
| rs217671 | 14 | 62360464 | G | A | 0.2719 | 0.0144 | 0.0019 | 1.3E-13 | 8.31E-05 | 57.44 |
| rs2196618 | 8 | 85089437 | G | A | 0.7246 | 0.0147 | 0.002 | 1.3E-13 | 7.84E-05 | 54.022 |
| rs2228213 | 6 | 12124855 | A | G | 0.3481 | -0.0139 | 0.0017 | 4.6E-16 | 8.40E-05 | 66.855 |
| rs2228552 | 1 | 32165495 | T | G | 0.6445 | 0.0127 | 0.0019 | 3.1E-11 | 7.98E-05 | 44.679 |
| rs2235564 | 1 | 6713114 | T | C | 0.3466 | 0.0131 | 0.0018 | 3.7E-13 | 7.66E-05 | 52.966 |
| rs2242189 | 4 | 38691024 | C | T | 0.3658 | -0.0135 | 0.0018 | 8.3E-14 | 8.32E-05 | 56.25 |
| rs2246012 | 6 | 131898208 | C | T | 0.1628 | 0.0158 | 0.0022 | 3.1E-13 | 6.48E-05 | 51.578 |
| rs2281819 | 6 | 33771673 | A | T | 0.2302 | -0.016 | 0.002 | 5.1E-15 | 9.30E-05 | 64 |
| rs2283093 | 7 | 126721231 | T | C | 0.2066 | 0.0127 | 0.0021 | 3.1E-09 | 5.29E-05 | 36.574 |
| rs2285178 | 22 | 38205989 | C | T | 0.3109 | 0.0112 | 0.0019 | 9.4E-09 | 5.44E-05 | 34.748 |
| rs2306537 | 12 | 133423695 | G | A | 0.3092 | 0.0133 | 0.0019 | 8.7E-13 | 7.08E-05 | 49 |
| rs2307111 | 5 | 75003678 | C | T | 0.3962 | -0.0265 | 0.0016 | 1.6E-58 | 3.45E-04 | 274.316 |
| rs2325036 | 3 | 85819412 | C | A | 0.3845 | -0.0181 | 0.0017 | 3.6E-27 | 1.43E-04 | 113.36 |
| rs2357760 | 6 | 120213880 | A | G | 0.6754 | 0.0145 | 0.0017 | 6.8E-17 | 9.20E-05 | 72.751 |
| rs2361988 | 16 | 398151 | C | T | 0.2539 | -0.0155 | 0.002 | 5.2E-15 | 8.70E-05 | 60.062 |
| rs2365389 | 3 | 61236462 | T | C | 0.4143 | -0.0174 | 0.0017 | 1.3E-25 | 1.34E-04 | 104.761 |
| rs2367112 | 5 | 64168193 | G | T | 0.4919 | -0.0119 | 0.0016 | 2.3E-13 | 6.96E-05 | 55.316 |
| rs2423668 | 20 | 12430673 | C | T | 0.5505 | -0.0105 | 0.0019 | 2.8E-08 | 5.79E-05 | 30.54 |
| rs2425840 | 20 | 44904838 | C | A | 0.4059 | 0.0119 | 0.0018 | 1.6E-11 | 6.41E-05 | 43.707 |
| rs2429150 | 12 | 2152655 | C | A | 0.4164 | 0.0111 | 0.0018 | 2.7E-10 | 5.54E-05 | 38.028 |
| rs2479958 | 13 | 111984244 | G | A | 0.5075 | -0.0154 | 0.0018 | 1.5E-17 | 1.10E-04 | 73.197 |
| rs2481665 | 1 | 62594677 | C | T | 0.4408 | -0.0161 | 0.0016 | 7.2E-23 | 1.27E-04 | 101.254 |
| rs2543132 | 8 | 15536311 | C | G | 0.8134 | 0.0146 | 0.0022 | 5.0E-11 | 6.40E-05 | 44.041 |
| rs2600226 | 3 | 12928762 | T | C | 0.6697 | -0.0116 | 0.0019 | 3.7E-10 | 5.44E-05 | 37.274 |
| rs2605603 | 11 | 93221105 | A | G | 0.4887 | -0.0103 | 0.0016 | 2.5E-10 | 5.24E-05 | 41.441 |
| rs2608703 | 12 | 41846769 | A | C | 0.4546 | 0.0142 | 0.0017 | 1.9E-16 | 1.02E-04 | 69.771 |
| rs262130 | 6 | 142853486 | T | C | 0.1969 | 0.0127 | 0.0023 | 1.8E-08 | 4.49E-05 | 30.49 |
| rs2693826 | 2 | 6160943 | A | G | 0.4421 | -0.0137 | 0.0017 | 2.0E-15 | 9.40E-05 | 64.944 |
| rs2694047 | 8 | 116750548 | G | A | 0.747 | 0.0188 | 0.002 | 3.9E-21 | 1.28E-04 | 88.36 |
| rs273504 | 19 | 18215247 | G | A | 0.4266 | 0.0153 | 0.0018 | 4.4E-18 | 1.05E-04 | 72.25 |
| rs2744974 | 6 | 34579431 | T | C | 0.338 | 0.0249 | 0.0018 | 1.4E-45 | 2.42E-04 | 191.361 |
| rs2791653 | 1 | 11129848 | G | A | 0.7577 | -0.0141 | 0.0019 | 1.3E-13 | 6.92E-05 | 55.072 |
| rs2820311 | 1 | 201841476 | G | A | 0.3369 | 0.0235 | 0.0018 | 4.1E-38 | 2.46E-04 | 170.447 |
| rs2832283 | 21 | 30690558 | A | G | 0.2208 | 0.0115 | 0.002 | 5.8E-09 | 4.17E-05 | 33.062 |
| rs2836964 | 21 | 40631006 | C | T | 0.3576 | -0.011 | 0.0018 | 1.3E-09 | 5.39E-05 | 37.346 |
| rs2861683 | 2 | 67836507 | C | A | 0.407 | -0.0144 | 0.0017 | 1.3E-16 | 1.04E-04 | 71.751 |
| rs287104 | 19 | 34290995 | A | G | 0.6604 | 0.0115 | 0.0017 | 4.4E-11 | 5.81E-05 | 45.761 |
| rs2875762 | 6 | 124925032 | C | G | 0.2473 | 0.0139 | 0.002 | 1.2E-11 | 7.05E-05 | 48.302 |
| rs2903971 | 3 | 116935744 | G | T | 0.1797 | -0.0145 | 0.0023 | 1.5E-10 | 5.75E-05 | 39.745 |
| rs2907948 | 7 | 150638484 | A | G | 0.2427 | -0.0141 | 0.0019 | 1.3E-13 | 6.93E-05 | 55.072 |
| rs2931434 | 5 | 73159098 | T | C | 0.3168 | -0.0104 | 0.0018 | 1.4E-08 | 4.83E-05 | 33.383 |
| rs2943465 | 12 | 19265921 | C | T | 0.9444 | 0.0248 | 0.0039 | 2.0E-10 | 5.89E-05 | 40.436 |
| rs294704 | 5 | 152519088 | T | G | 0.7239 | -0.0113 | 0.0019 | 4.0E-09 | 5.13E-05 | 35.371 |
| rs3007105 | 14 | 47367616 | T | C | 0.4697 | 0.0142 | 0.0017 | 1.1E-17 | 8.88E-05 | 69.771 |
| rs326896 | 4 | 112669571 | T | C | 0.3925 | -0.0128 | 0.0018 | 2.8E-13 | 7.32E-05 | 50.568 |
| rs331966 | 4 | 143675717 | C | A | 0.3792 | 0.0112 | 0.0018 | 3.2E-10 | 5.63E-05 | 38.716 |
| rs33500 | 3 | 42427191 | T | C | 0.8082 | -0.0167 | 0.0022 | 4.3E-14 | 8.36E-05 | 57.622 |
| rs339991 | 15 | 60913637 | G | A | 0.5631 | 0.0124 | 0.0018 | 1.2E-12 | 6.91E-05 | 47.457 |
| rs349088 | 11 | 84814393 | A | C | 0.4976 | -0.0128 | 0.0017 | 1.8E-13 | 8.28E-05 | 56.692 |
| rs3731695 | 2 | 203820275 | C | T | 0.5582 | 0.0116 | 0.0016 | 7.9E-13 | 6.62E-05 | 52.562 |
| rs3732084 | 2 | 207174316 | C | T | 0.6139 | 0.0107 | 0.0018 | 1.1E-09 | 5.11E-05 | 35.336 |
| rs3736485 | 15 | 51748610 | G | A | 0.5443 | -0.0134 | 0.0016 | 2.5E-16 | 8.87E-05 | 70.14 |
| rs3749897 | 6 | 42532102 | T | C | 0.4172 | 0.0122 | 0.0018 | 8.4E-12 | 7.20E-05 | 45.938 |
| rs3754963 | 2 | 166185707 | T | A | 0.2574 | -0.0123 | 0.002 | 3.3E-10 | 5.47E-05 | 37.822 |
| rs3764835 | 2 | 159519368 | A | G | 0.1528 | -0.0141 | 0.0024 | 3.1E-09 | 5.01E-05 | 34.516 |
| rs3772882 | 3 | 81808602 | A | C | 0.3661 | 0.0127 | 0.0018 | 6.6E-13 | 7.19E-05 | 49.781 |
| rs3800229 | 6 | 108996963 | T | G | 0.7123 | 0.0175 | 0.0018 | 1.4E-22 | 1.19E-04 | 94.521 |
| rs3800637 | 7 | 137403432 | C | T | 0.336 | 0.0115 | 0.0018 | 5.1E-10 | 5.98E-05 | 40.818 |
| rs3806572 | 2 | 55238677 | A | G | 0.2788 | -0.0145 | 0.0019 | 1.6E-14 | 8.47E-05 | 58.241 |
| rs3807645 | 7 | 77830091 | A | G | 0.221 | -0.0166 | 0.0021 | 2.4E-15 | 9.15E-05 | 62.485 |
| rs380857 | 9 | 101491066 | A | C | 0.8878 | -0.0151 | 0.0027 | 3.6E-08 | 4.52E-05 | 31.277 |
| rs3814883 | 16 | 29994922 | T | C | 0.4764 | 0.0232 | 0.0017 | 1.1E-40 | 2.72E-04 | 186.242 |
| rs3829849 | 9 | 129390800 | T | C | 0.3589 | 0.0098 | 0.0017 | 5.9E-09 | 4.19E-05 | 33.232 |
| rs38314 | 7 | 70067315 | A | G | 0.4912 | -0.012 | 0.0017 | 4.7E-12 | 7.22E-05 | 49.827 |
| rs3844598 | 5 | 140992235 | G | A | 0.521 | 0.0095 | 0.0017 | 3.8E-08 | 4.52E-05 | 31.228 |
| rs3904244 | 10 | 27361527 | A | T | 0.1377 | 0.0155 | 0.0025 | 4.3E-10 | 5.56E-05 | 38.44 |
| rs391300 | 17 | 2216258 | C | T | 0.6275 | -0.0119 | 0.0017 | 3.1E-12 | 6.19E-05 | 49 |
| rs3935648 | 17 | 79085335 | G | C | 0.2328 | -0.0125 | 0.0022 | 6.8E-09 | 5.13E-05 | 32.283 |
| rs3977755 | 10 | 104420210 | T | C | 0.2804 | -0.0135 | 0.0019 | 5.9E-13 | 6.90E-05 | 50.485 |
| rs40067 | 5 | 107439012 | A | G | 0.1713 | -0.0266 | 0.0023 | 7.1E-30 | 1.96E-04 | 133.754 |
| rs4012234 | 20 | 32553047 | G | T | 0.5924 | 0.0141 | 0.0018 | 9.9E-16 | 8.90E-05 | 61.361 |
| rs4072917 | 8 | 143300279 | A | G | 0.4694 | 0.0115 | 0.0018 | 6.9E-11 | 5.96E-05 | 40.818 |
| rs4148155 | 4 | 89054667 | G | A | 0.1127 | -0.0188 | 0.0026 | 5.0E-13 | 6.58E-05 | 52.284 |
| rs4148866 | 12 | 123425575 | T | C | 0.4068 | 0.0098 | 0.0018 | 4.0E-08 | 4.38E-05 | 29.642 |
| rs4151664 | 6 | 31920873 | T | C | 0.05847 | 0.02 | 0.0035 | 1.4E-08 | 4.19E-05 | 32.653 |
| rs4237643 | 11 | 43648368 | G | T | 0.6938 | -0.0223 | 0.0019 | 4.3E-33 | 1.99E-04 | 137.753 |
| rs427943 | 21 | 46570896 | C | A | 0.5669 | 0.017 | 0.0017 | 7.3E-23 | 1.40E-04 | 100 |
| rs429343 | 2 | 147903382 | G | A | 0.5813 | -0.015 | 0.0017 | 6.8E-18 | 1.13E-04 | 77.854 |
| rs4307239 | 7 | 24354300 | G | A | 0.4578 | 0.0115 | 0.0017 | 3.9E-11 | 6.66E-05 | 45.761 |
| rs4358081 | 2 | 29100642 | C | A | 0.4631 | 0.0097 | 0.0017 | 1.5E-08 | 4.72E-05 | 32.557 |
| rs4414033 | 1 | 156406853 | A | G | 0.627 | 0.0129 | 0.0018 | 1.4E-12 | 7.63E-05 | 51.361 |
| rs4430672 | 14 | 63094407 | C | T | 0.8004 | -0.0127 | 0.0022 | 3.9E-09 | 4.82E-05 | 33.324 |
| rs4482463 | 2 | 205375909 | A | C | 0.9213 | -0.0331 | 0.0033 | 2.8E-23 | 1.58E-04 | 100.607 |
| rs4516268 | 17 | 1846831 | A | C | 0.1925 | -0.0217 | 0.0021 | 5.2E-25 | 1.36E-04 | 106.778 |
| rs4518345 | 5 | 27185904 | A | G | 0.2842 | -0.0117 | 0.0019 | 1.0E-09 | 5.51E-05 | 37.92 |
| rs4556997 | 2 | 100814858 | A | C | 0.1349 | 0.0197 | 0.0024 | 6.9E-17 | 8.50E-05 | 67.377 |
| rs4589691 | 2 | 144051398 | G | C | 0.1579 | 0.0141 | 0.0024 | 4.7E-09 | 5.01E-05 | 34.516 |
| rs4639527 | 2 | 416815 | G | A | 0.3012 | 0.0172 | 0.0019 | 3.3E-20 | 1.18E-04 | 81.95 |
| rs4653017 | 1 | 33776728 | T | C | 0.6818 | 0.0122 | 0.0018 | 4.5E-11 | 6.69E-05 | 45.938 |
| rs4660443 | 1 | 39591779 | T | C | 0.2218 | 0.0164 | 0.0021 | 6.8E-15 | 8.87E-05 | 60.988 |
| rs4671328 | 2 | 58935282 | G | T | 0.5533 | -0.0219 | 0.0017 | 2.2E-36 | 2.44E-04 | 165.955 |
| rs4713436 | 6 | 31084639 | T | C | 0.1731 | -0.0133 | 0.0024 | 1.8E-08 | 4.44E-05 | 30.71 |
| rs4722398 | 7 | 3125220 | T | C | 0.1336 | 0.0158 | 0.0025 | 3.6E-10 | 5.77E-05 | 39.942 |
| rs4740619 | 9 | 15634326 | C | T | 0.4521 | -0.0186 | 0.0016 | 2.3E-30 | 1.70E-04 | 135.14 |
| rs4757144 | 11 | 13331226 | A | G | 0.5878 | 0.0169 | 0.0018 | 5.6E-22 | 1.28E-04 | 88.151 |
| rs4783830 | 16 | 54255346 | A | G | 0.3074 | -0.0105 | 0.0019 | 2.4E-08 | 4.52E-05 | 30.54 |
| rs4800191 | 18 | 22461398 | C | G | 0.6369 | 0.0103 | 0.0017 | 2.5E-09 | 4.67E-05 | 36.709 |
| rs4813619 | 20 | 2815715 | T | G | 0.5101 | -0.0108 | 0.0018 | 2.3E-09 | 5.78E-05 | 36 |
| rs4818225 | 21 | 42629895 | G | A | 0.6606 | 0.0117 | 0.0018 | 2.3E-10 | 6.14E-05 | 42.25 |
| rs4820408 | 22 | 40604945 | G | T | 0.592 | -0.0151 | 0.0017 | 2.1E-19 | 9.93E-05 | 78.896 |
| rs4842491 | 12 | 89905537 | T | C | 0.7138 | 0.0098 | 0.0018 | 4.0E-08 | 3.73E-05 | 29.642 |
| rs4851029 | 2 | 104159785 | G | T | 0.5247 | 0.0121 | 0.0017 | 1.7E-12 | 7.34E-05 | 50.661 |
| rs4858193 | 3 | 20441050 | C | T | 0.2779 | -0.0129 | 0.0019 | 1.6E-11 | 6.71E-05 | 46.097 |
| rs4864201 | 4 | 130731284 | C | T | 0.6469 | -0.0141 | 0.0017 | 1.5E-16 | 8.65E-05 | 68.792 |
| rs4880341 | 10 | 133992689 | T | C | 0.5606 | -0.0118 | 0.0017 | 1.1E-11 | 6.99E-05 | 48.18 |
| rs4906908 | 15 | 27040082 | G | T | 0.5253 | 0.0103 | 0.0017 | 2.5E-09 | 5.31E-05 | 36.709 |
| rs491711 | 11 | 28742220 | C | A | 0.316 | -0.0115 | 0.0019 | 1.1E-09 | 5.35E-05 | 36.634 |
| rs4929923 | 11 | 8639200 | C | T | 0.6376 | 0.0181 | 0.0017 | 7.2E-27 | 1.43E-04 | 113.36 |
| rs4936175 | 11 | 132641959 | C | T | 0.4445 | 0.0122 | 0.0017 | 1.4E-12 | 7.44E-05 | 51.502 |
| rs4937870 | 11 | 112826709 | G | A | 0.3172 | -0.0109 | 0.0019 | 8.8E-09 | 4.82E-05 | 32.911 |
| rs4952843 | 2 | 46957845 | G | A | 0.3807 | -0.0131 | 0.0018 | 6.8E-14 | 7.65E-05 | 52.966 |
| rs4954638 | 2 | 137435455 | C | A | 0.2492 | -0.0118 | 0.002 | 2.9E-09 | 5.04E-05 | 34.81 |
| rs4968656 | 17 | 61616959 | G | A | 0.3216 | 0.0116 | 0.0019 | 8.2E-10 | 5.52E-05 | 37.274 |
| rs4981693 | 14 | 29680331 | A | G | 0.771 | 0.0206 | 0.002 | 6.9E-24 | 1.54E-04 | 106.09 |
| rs4986044 | 17 | 21261560 | T | C | 0.4687 | -0.0164 | 0.0016 | 3.3E-23 | 1.33E-04 | 105.062 |
| rs538579 | 3 | 62711674 | C | G | 0.3228 | 0.0137 | 0.0019 | 1.3E-13 | 7.55E-05 | 51.992 |
| rs543874 | 1 | 177889480 | G | A | 0.1952 | 0.0475 | 0.002 | 1.2E-122 | 7.09E-04 | 564.061 |
| rs559231 | 18 | 39644247 | T | G | 0.3956 | 0.0135 | 0.0018 | 2.4E-14 | 8.21E-05 | 56.25 |
| rs577525 | 10 | 99769388 | C | T | 0.5676 | 0.0166 | 0.0017 | 9.7E-22 | 1.38E-04 | 95.349 |
| rs592483 | 11 | 69445173 | T | C | 0.5716 | -0.0147 | 0.0017 | 2.0E-18 | 9.56E-05 | 74.771 |
| rs6050446 | 20 | 25195509 | G | A | 0.97001 | 0.0343 | 0.0047 | 4.4E-13 | 6.95E-05 | 53.259 |
| rs6235 | 5 | 95728898 | G | C | 0.2702 | 0.0175 | 0.0019 | 1.5E-19 | 1.23E-04 | 84.834 |
| rs6265 | 11 | 27679916 | T | C | 0.1951 | -0.0412 | 0.0021 | 1.0E-86 | 4.84E-04 | 384.906 |
| rs6443750 | 3 | 181329682 | C | T | 0.8068 | 0.0148 | 0.0021 | 3.2E-12 | 6.39E-05 | 49.669 |
| rs6448587 | 4 | 28561990 | C | A | 0.1891 | -0.0167 | 0.0023 | 2.3E-13 | 7.63E-05 | 52.72 |
| rs645040 | 3 | 135926622 | T | G | 0.7762 | 0.0171 | 0.002 | 2.5E-18 | 9.19E-05 | 73.102 |
| rs6461115 | 7 | 2103668 | G | A | 0.2285 | -0.0144 | 0.0019 | 1.2E-13 | 7.25E-05 | 57.44 |
| rs6471941 | 8 | 62117973 | A | G | 0.1684 | 0.0156 | 0.0021 | 3.1E-13 | 6.95E-05 | 55.184 |
| rs6500208 | 16 | 49011249 | A | G | 0.2006 | 0.014 | 0.002 | 4.1E-12 | 6.27E-05 | 49 |
| rs6512302 | 20 | 62691550 | C | G | 0.7511 | 0.0142 | 0.002 | 2.1E-12 | 7.35E-05 | 50.41 |
| rs6545714 | 2 | 59307725 | A | G | 0.6139 | -0.0191 | 0.0017 | 9.1E-31 | 1.59E-04 | 126.232 |
| rs6556301 | 5 | 176527577 | T | G | 0.3596 | -0.0111 | 0.0018 | 4.1E-10 | 5.18E-05 | 38.028 |
| rs6561943 | 13 | 58356761 | T | C | 0.2595 | 0.0119 | 0.0019 | 4.2E-10 | 4.94E-05 | 39.227 |
| rs657452 | 1 | 49589847 | G | A | 0.6216 | -0.0188 | 0.0017 | 7.2E-29 | 1.59E-04 | 122.297 |
| rs6587552 | 1 | 151018861 | G | A | 0.7591 | -0.0173 | 0.002 | 1.6E-17 | 1.08E-04 | 74.822 |
| rs6591407 | 11 | 56914157 | A | C | 0.1861 | -0.0118 | 0.0021 | 1.9E-08 | 3.98E-05 | 31.574 |
| rs6593688 | 1 | 96322205 | G | A | 0.3733 | 0.0137 | 0.0018 | 8.6E-15 | 8.37E-05 | 57.929 |
| rs663129 | 18 | 57838401 | A | G | 0.2301 | 0.0545 | 0.0019 | 1.6E-178 | 0.001 | 822.782 |
| rs6673081 | 1 | 154989595 | C | T | 0.5534 | -0.01 | 0.0018 | 1.8E-08 | 4.55E-05 | 30.864 |
| rs6692586 | 1 | 23299906 | G | A | 0.832 | -0.0192 | 0.0023 | 1.1E-16 | 1.01E-04 | 69.686 |
| rs6712 | 22 | 50637922 | C | G | 0.1368 | 0.0138 | 0.0025 | 4.4E-08 | 4.43E-05 | 30.47 |
| rs6734537 | 2 | 207925963 | C | T | 0.1971 | 0.0133 | 0.0022 | 1.0E-09 | 5.32E-05 | 36.547 |
| rs6764533 | 3 | 196088464 | A | G | 0.359 | 0.0116 | 0.0018 | 1.4E-10 | 6.01E-05 | 41.531 |
| rs6772756 | 3 | 182312152 | G | A | 0.3372 | -0.0104 | 0.0019 | 4.0E-08 | 4.39E-05 | 29.961 |
| rs6785245 | 3 | 82647990 | C | T | 0.3969 | 0.0132 | 0.0017 | 4.0E-14 | 8.71E-05 | 60.29 |
| rs6804842 | 3 | 25106437 | G | A | 0.572 | 0.0156 | 0.0017 | 3.6E-21 | 1.07E-04 | 84.207 |
| rs6841761 | 4 | 25423538 | T | G | 0.5252 | -0.0131 | 0.0016 | 6.4E-16 | 8.45E-05 | 67.035 |
| rs6985109 | 8 | 10761585 | A | G | 0.5338 | -0.0177 | 0.0017 | 1.5E-26 | 1.37E-04 | 108.405 |
| rs7024334 | 9 | 109072075 | G | T | 0.7742 | -0.0138 | 0.002 | 3.1E-12 | 6.08E-05 | 47.61 |
| rs7025938 | 9 | 103088321 | G | C | 0.3187 | 0.0166 | 0.0019 | 3.7E-19 | 1.10E-04 | 76.332 |
| rs7037266 | 9 | 6942940 | A | C | 0.3739 | -0.0112 | 0.0018 | 3.5E-10 | 5.60E-05 | 38.716 |
| rs705704 | 12 | 56435412 | A | G | 0.3304 | -0.0131 | 0.0018 | 1.9E-13 | 7.12E-05 | 52.966 |
| rs7084454 | 10 | 21821274 | A | G | 0.335 | 0.0193 | 0.0019 | 4.0E-25 | 1.52E-04 | 103.183 |
| rs709400 | 14 | 104149475 | G | A | 0.3818 | -0.015 | 0.0017 | 4.6E-19 | 9.79E-05 | 77.854 |
| rs7102454 | 11 | 65594820 | C | T | 0.3435 | 0.0158 | 0.0018 | 2.4E-18 | 1.11E-04 | 77.049 |
| rs7117238 | 11 | 78040259 | A | G | 0.168 | -0.0131 | 0.0022 | 2.5E-09 | 4.49E-05 | 35.457 |
| rs7124681 | 11 | 47529947 | A | C | 0.4133 | 0.0263 | 0.0016 | 3.2E-58 | 3.40E-04 | 270.191 |
| rs7138803 | 12 | 50247468 | A | G | 0.3772 | 0.03 | 0.0017 | 2.3E-71 | 3.91E-04 | 311.418 |
| rs7144011 | 14 | 79940383 | T | G | 0.2136 | 0.0282 | 0.002 | 5.2E-47 | 2.50E-04 | 198.809 |
| rs7172627 | 15 | 31877690 | G | A | 0.4719 | 0.0117 | 0.0017 | 1.1E-11 | 6.86E-05 | 47.367 |
| rs7181498 | 15 | 95271404 | C | T | 0.6309 | -0.0163 | 0.0018 | 1.0E-19 | 1.19E-04 | 82.003 |
| rs7196720 | 16 | 24534662 | C | T | 0.5068 | -0.0129 | 0.0017 | 7.3E-14 | 8.35E-05 | 57.581 |
| rs7206608 | 16 | 82872628 | G | C | 0.3146 | 0.0132 | 0.0019 | 1.3E-12 | 7.00E-05 | 48.266 |
| rs7222349 | 17 | 42304644 | A | G | 0.3441 | 0.0115 | 0.0018 | 3.3E-10 | 5.90E-05 | 40.818 |
| rs7239575 | 18 | 21120035 | C | T | 0.4832 | -0.0202 | 0.0017 | 7.4E-32 | 2.04E-04 | 141.19 |
| rs7318817 | 13 | 28617708 | T | C | 0.6071 | -0.0155 | 0.0018 | 2.7E-18 | 1.07E-04 | 74.151 |
| rs7334078 | 13 | 99120484 | C | T | 0.2882 | -0.0121 | 0.0019 | 2.2E-10 | 5.89E-05 | 40.557 |
| rs7488867 | 12 | 103699685 | T | C | 0.2639 | -0.0204 | 0.002 | 8.4E-24 | 1.64E-04 | 104.04 |
| rs7498665 | 16 | 28883241 | G | A | 0.4038 | 0.0271 | 0.0017 | 5.6E-60 | 3.21E-04 | 254.12 |
| rs7512146 | 1 | 34283008 | T | G | 0.5084 | -0.0094 | 0.0017 | 3.9E-08 | 4.44E-05 | 30.574 |
| rs7535528 | 1 | 2444414 | A | G | 0.3741 | -0.0152 | 0.0018 | 1.4E-16 | 1.13E-04 | 71.308 |
| rs754635 | 3 | 42305131 | G | C | 0.8873 | 0.0198 | 0.0027 | 2.2E-13 | 7.79E-05 | 53.778 |
| rs7550711 | 1 | 110082886 | T | C | 0.03058 | 0.0649 | 0.005 | 3.2E-38 | 2.19E-04 | 168.48 |
| rs7551507 | 1 | 74995225 | T | C | 0.5633 | -0.0184 | 0.0016 | 9.3E-30 | 1.66E-04 | 132.25 |
| rs7557796 | 2 | 86766153 | C | T | 0.6524 | -0.016 | 0.0018 | 2.3E-19 | 1.14E-04 | 79.012 |
| rs756717 | 16 | 72996162 | A | G | 0.3973 | -0.0148 | 0.0017 | 5.4E-18 | 9.82E-05 | 75.792 |
| rs7594289 | 2 | 219652286 | G | A | 0.4292 | 0.0111 | 0.0017 | 1.6E-10 | 6.21E-05 | 42.633 |
| rs7598508 | 2 | 230641763 | C | T | 0.3292 | 0.0154 | 0.0018 | 6.7E-17 | 1.06E-04 | 73.197 |
| rs7599312 | 2 | 213413231 | A | G | 0.2652 | -0.0186 | 0.0019 | 6.9E-24 | 1.23E-04 | 95.834 |
| rs7615297 | 3 | 156299313 | G | C | 0.1465 | -0.0149 | 0.0024 | 5.7E-10 | 5.59E-05 | 38.543 |
| rs7626079 | 3 | 66427259 | T | C | 0.3434 | 0.011 | 0.0018 | 1.6E-09 | 5.39E-05 | 37.346 |
| rs7637852 | 3 | 44041777 | G | A | 0.6951 | -0.0139 | 0.0019 | 1.7E-13 | 7.74E-05 | 53.521 |
| rs7640424 | 3 | 107820063 | T | C | 0.2969 | -0.0136 | 0.0018 | 2.3E-14 | 7.22E-05 | 57.086 |
| rs765875 | 6 | 143185683 | T | C | 0.4808 | -0.0121 | 0.0017 | 3.0E-12 | 7.33E-05 | 50.661 |
| rs7683836 | 4 | 180167906 | A | G | 0.5405 | -0.0114 | 0.0017 | 6.3E-11 | 6.55E-05 | 44.969 |
| rs7685048 | 4 | 95027784 | T | C | 0.4654 | -0.0101 | 0.0017 | 4.1E-09 | 5.10E-05 | 35.297 |
| rs768840 | 14 | 73143457 | A | G | 0.4183 | 0.0114 | 0.0018 | 2.0E-10 | 5.92E-05 | 40.111 |
| rs769449 | 19 | 45410002 | A | G | 0.1161 | -0.0254 | 0.0027 | 2.3E-20 | 1.56E-04 | 88.499 |
| rs7694732 | 4 | 115124089 | G | A | 0.4378 | -0.0099 | 0.0017 | 8.7E-09 | 4.91E-05 | 33.913 |
| rs7703576 | 5 | 144543996 | C | T | 0.2885 | 0.0103 | 0.0019 | 4.8E-08 | 4.25E-05 | 29.388 |
| rs7704281 | 5 | 50591460 | A | G | 0.04531 | 0.0271 | 0.0041 | 6.5E-11 | 5.54E-05 | 43.689 |
| rs7715256 | 5 | 153537893 | T | G | 0.5781 | -0.0166 | 0.0016 | 2.2E-24 | 1.35E-04 | 107.64 |
| rs7724675 | 5 | 130440010 | A | G | 0.2238 | -0.0119 | 0.0021 | 9.5E-09 | 4.64E-05 | 32.111 |
| rs7730004 | 5 | 43191033 | T | C | 0.6693 | 0.0148 | 0.0018 | 9.1E-16 | 9.79E-05 | 67.605 |
| rs7730898 | 5 | 170459675 | A | G | 0.729 | 0.0168 | 0.0018 | 4.5E-20 | 1.10E-04 | 87.111 |
| rs774246 | 7 | 26990816 | G | A | 0.1444 | 0.0153 | 0.0025 | 5.4E-10 | 5.42E-05 | 37.454 |
| rs7761673 | 6 | 70357368 | A | T | 0.2058 | -0.0126 | 0.0021 | 1.9E-09 | 5.20E-05 | 36 |
| rs7780752 | 7 | 93241640 | C | T | 0.36 | 0.0139 | 0.0018 | 1.0E-14 | 8.63E-05 | 59.633 |
| rs7788008 | 7 | 112972483 | A | G | 0.4445 | -0.0157 | 0.0017 | 1.1E-19 | 1.24E-04 | 85.29 |
| rs7811342 | 7 | 138794618 | C | T | 0.1058 | -0.0197 | 0.0029 | 1.1E-11 | 6.82E-05 | 46.146 |
| rs7819514 | 8 | 93204442 | A | G | 0.3216 | -0.0107 | 0.0018 | 5.7E-09 | 5.16E-05 | 35.336 |
| rs7826312 | 8 | 32400115 | C | T | 0.5879 | 0.0104 | 0.0017 | 4.9E-10 | 4.77E-05 | 37.426 |
| rs7844647 | 8 | 34503776 | C | T | 0.2681 | -0.0123 | 0.0018 | 2.8E-11 | 5.88E-05 | 46.694 |
| rs784944 | 4 | 52927229 | G | A | 0.7489 | -0.0122 | 0.0019 | 3.9E-10 | 5.99E-05 | 41.23 |
| rs7869771 | 9 | 94180627 | C | A | 0.2647 | -0.014 | 0.0019 | 4.9E-13 | 7.99E-05 | 54.293 |
| rs7871866 | 9 | 131027982 | C | G | 0.1531 | 0.0187 | 0.0024 | 2.3E-14 | 8.88E-05 | 60.71 |
| rs7899106 | 10 | 87410904 | G | A | 0.04777 | 0.0331 | 0.0037 | 1.0E-18 | 1.01E-04 | 80.03 |
| rs7903146 | 10 | 114758349 | T | C | 0.2912 | -0.0181 | 0.0018 | 1.3E-23 | 1.27E-04 | 101.114 |
| rs7925214 | 11 | 130794253 | T | C | 0.5133 | 0.0147 | 0.0018 | 4.4E-17 | 9.84E-05 | 66.694 |
| rs7933205 | 11 | 97831073 | G | A | 0.7885 | 0.0116 | 0.0021 | 3.2E-08 | 4.41E-05 | 30.512 |
| rs7970953 | 12 | 24075508 | A | G | 0.29 | 0.0135 | 0.0018 | 9.8E-14 | 7.13E-05 | 56.25 |
| rs7983065 | 13 | 33380786 | T | C | 0.4503 | -0.0148 | 0.0017 | 8.9E-18 | 1.10E-04 | 75.792 |
| rs7998796 | 13 | 81020036 | G | A | 0.3373 | 0.0105 | 0.0018 | 1.1E-08 | 4.94E-05 | 34.028 |
| rs8036040 | 15 | 36402716 | A | C | 0.4932 | 0.0109 | 0.0017 | 2.7E-10 | 5.95E-05 | 41.111 |
| rs8065336 | 17 | 35064187 | C | T | 0.6901 | 0.012 | 0.0019 | 1.9E-10 | 5.79E-05 | 39.889 |
| rs806600 | 5 | 172914939 | G | A | 0.475 | -0.0095 | 0.0017 | 3.3E-08 | 4.51E-05 | 31.228 |
| rs8071182 | 17 | 55336155 | A | G | 0.1735 | 0.0133 | 0.0022 | 2.1E-09 | 4.74E-05 | 36.547 |
| rs8090983 | 18 | 52586691 | G | A | 0.3314 | 0.0118 | 0.0018 | 2.0E-10 | 6.30E-05 | 42.975 |
| rs8097672 | 18 | 1839601 | T | A | 0.1528 | 0.02 | 0.0025 | 8.4E-16 | 9.33E-05 | 64 |
| rs8097783 | 18 | 58051294 | A | G | 0.07554 | -0.0389 | 0.0031 | 7.2E-36 | 1.98E-04 | 157.462 |
| rs8123881 | 20 | 15819495 | G | A | 0.1299 | 0.0196 | 0.0024 | 4.4E-16 | 8.41E-05 | 66.694 |
| rs8181823 | 13 | 65477940 | C | A | 0.7614 | 0.0127 | 0.002 | 4.1E-10 | 5.83E-05 | 40.322 |
| rs818524 | 1 | 85201228 | C | T | 0.6939 | 0.0106 | 0.0019 | 3.4E-08 | 4.64E-05 | 31.125 |
| rs8192675 | 3 | 170724883 | C | T | 0.2888 | 0.0152 | 0.0018 | 1.4E-17 | 8.96E-05 | 71.308 |
| rs825688 | 16 | 73595718 | T | C | 0.456 | -0.0095 | 0.0017 | 4.7E-08 | 4.55E-05 | 31.228 |
| rs845084 | 10 | 125220036 | A | G | 0.2678 | 0.014 | 0.002 | 1.3E-12 | 7.15E-05 | 49 |
| rs852056 | 20 | 17102860 | C | T | 0.7584 | -0.0128 | 0.002 | 1.8E-10 | 5.92E-05 | 40.96 |
| rs865809 | 3 | 183997735 | G | A | 0.7678 | -0.0127 | 0.002 | 5.4E-10 | 5.85E-05 | 40.322 |
| rs872281 | 14 | 40834177 | T | C | 0.1728 | -0.0151 | 0.0023 | 4.7E-11 | 6.29E-05 | 43.102 |
| rs876605 | 5 | 77801359 | G | A | 0.7352 | -0.0108 | 0.002 | 3.4E-08 | 4.21E-05 | 29.16 |
| rs879620 | 16 | 4015729 | T | C | 0.6179 | 0.0231 | 0.0018 | 5.3E-38 | 2.39E-04 | 164.694 |
| rs889398 | 16 | 69556715 | T | C | 0.4247 | -0.0196 | 0.0016 | 1.3E-32 | 1.90E-04 | 150.062 |
| rs895330 | 19 | 4060707 | G | C | 0.1924 | -0.0201 | 0.0023 | 5.5E-19 | 1.12E-04 | 76.372 |
| rs901630 | 6 | 98539519 | T | C | 0.3973 | -0.0146 | 0.0017 | 1.9E-18 | 9.28E-05 | 73.758 |
| rs902695 | 2 | 113955074 | A | G | 0.4798 | -0.0103 | 0.0017 | 2.2E-09 | 5.41E-05 | 36.709 |
| rs9284814 | 3 | 88273071 | A | G | 0.892 | 0.0228 | 0.0027 | 3.1E-17 | 1.03E-04 | 71.308 |
| rs9288754 | 3 | 194825090 | C | T | 0.5884 | 0.0096 | 0.0017 | 4.1E-08 | 4.63E-05 | 31.889 |
| rs9294260 | 6 | 83433228 | A | G | 0.4731 | 0.0147 | 0.0016 | 1.8E-19 | 1.08E-04 | 84.41 |
| rs9300422 | 13 | 98223320 | G | A | 0.6903 | -0.0103 | 0.0018 | 4.0E-09 | 4.12E-05 | 32.744 |
| rs930295 | 2 | 50233352 | C | A | 0.8417 | -0.0211 | 0.0023 | 1.0E-19 | 1.22E-04 | 84.16 |
| rs9304665 | 19 | 47602577 | A | T | 0.7633 | 0.0229 | 0.002 | 2.9E-29 | 1.90E-04 | 131.102 |
| rs934224 | 2 | 16613889 | T | C | 0.7399 | 0.0107 | 0.002 | 4.7E-08 | 4.13E-05 | 28.622 |
| rs9362662 | 6 | 90296588 | G | A | 0.5201 | -0.0112 | 0.0017 | 1.2E-10 | 6.35E-05 | 43.405 |
| rs9367368 | 6 | 13189275 | C | T | 0.3033 | -0.0121 | 0.0018 | 1.0E-11 | 5.74E-05 | 45.188 |
| rs9375702 | 6 | 130384187 | T | C | 0.705 | -0.0115 | 0.0019 | 7.9E-10 | 5.30E-05 | 36.634 |
| rs9382285 | 6 | 53958294 | G | A | 0.04613 | 0.023 | 0.0042 | 3.9E-08 | 4.35E-05 | 29.989 |
| rs9408882 | 9 | 118664402 | A | G | 0.4594 | -0.0093 | 0.0016 | 1.3E-08 | 4.25E-05 | 33.785 |
| rs946824 | 1 | 243684019 | C | T | 0.859 | -0.0206 | 0.0026 | 1.1E-15 | 9.10E-05 | 62.775 |
| rs947612 | 6 | 73738661 | A | G | 0.7516 | -0.0116 | 0.002 | 5.6E-09 | 4.86E-05 | 33.64 |
| rs9522285 | 13 | 112230701 | A | G | 0.4143 | 0.0127 | 0.0017 | 2.5E-13 | 8.08E-05 | 55.81 |
| rs9538162 | 13 | 59265043 | C | T | 0.4138 | -0.0156 | 0.0018 | 4.8E-19 | 1.09E-04 | 75.111 |
| rs9547153 | 13 | 85903717 | G | A | 0.3839 | 0.0098 | 0.0017 | 8.7E-09 | 4.29E-05 | 33.232 |
| rs9571687 | 13 | 67472713 | A | C | 0.329 | -0.0129 | 0.0018 | 2.8E-12 | 7.43E-05 | 51.361 |
| rs9615905 | 22 | 48875699 | T | C | 0.45 | 0.011 | 0.0017 | 2.7E-10 | 6.07E-05 | 41.868 |
| rs962273 | 17 | 46978353 | C | T | 0.7057 | 0.0137 | 0.0019 | 2.6E-13 | 7.51E-05 | 51.992 |
| rs9650755 | 9 | 96484342 | G | A | 0.2664 | 0.0154 | 0.002 | 2.8E-15 | 8.58E-05 | 59.29 |
| rs9688431 | 6 | 73922654 | C | T | 0.06034 | -0.0231 | 0.0035 | 2.4E-11 | 5.52E-05 | 43.56 |
| rs977747 | 1 | 47684677 | G | T | 0.5949 | -0.0169 | 0.0017 | 1.3E-24 | 1.25E-04 | 98.827 |
| rs9783858 | 18 | 42534584 | T | C | 0.5191 | 0.0091 | 0.0017 | 3.3E-08 | 3.72E-05 | 28.654 |
| rs9806742 | 15 | 73051219 | A | G | 0.8826 | 0.0208 | 0.0026 | 1.4E-15 | 9.24E-05 | 64 |
| rs9816226 | 3 | 185834499 | T | A | 0.8199 | 0.0323 | 0.0021 | 1.6E-52 | 3.04E-04 | 236.573 |
| rs9845966 | 3 | 13433158 | G | T | 0.5479 | -0.0105 | 0.0017 | 2.5E-10 | 4.90E-05 | 38.149 |
| rs987237 | 6 | 50803050 | G | A | 0.1803 | 0.0409 | 0.0021 | 9.3E-84 | 4.77E-04 | 379.321 |
| rs9926784 | 16 | 19941968 | C | T | 0.1822 | -0.0258 | 0.0021 | 9.9E-35 | 1.91E-04 | 150.938 |
| rs9927848 | 16 | 23833071 | A | C | 0.7326 | -0.0122 | 0.002 | 6.4E-10 | 5.42E-05 | 37.21 |
| rs9951619 | 18 | 56882326 | G | T | 0.7643 | 0.0156 | 0.002 | 1.4E-15 | 7.87E-05 | 60.84 |
| rs998732 | 19 | 19378671 | G | A | 0.1578 | -0.0171 | 0.0022 | 2.0E-14 | 7.61E-05 | 60.415 |
| rs9989141 | 14 | 94006257 | T | C | 0.6387 | 0.0162 | 0.0017 | 3.6E-21 | 1.21E-04 | 90.809 |
| rs999889 | 10 | 84279949 | A | G | 0.2818 | -0.0108 | 0.0019 | 1.4E-08 | 4.68E-05 | 32.31 |

**Table S2. Instrumental SNPs for BMI obtained from UK Biobank.**

| SNP | CHR | POS | Effect allele | Other allele | EAF | Beta | SE | *P*-value | R2 | F-statistic |
| --- | --- | --- | --- | --- | --- | --- | --- | --- | --- | --- |
| rs10100245 | 8 | 77226919 | A | G | 0.56644 | 0.0206373 | 0.0024231 | 1.64E-17 | 2.16E-04 | 72.54 |
| rs10184537 | 2 | 50742025 | T | C | 0.335925 | -0.016474 | 0.002548 | 1.01E-10 | 1.24E-04 | 41.805 |
| rs10404726 | 19 | 18834514 | T | C | 0.466784 | -0.01986 | 0.0024074 | 1.60E-16 | 2.02E-04 | 68.051 |
| rs10465231 | 9 | 92183413 | T | C | 0.5494 | 0.0171399 | 0.0024273 | 1.65E-12 | 1.48E-04 | 49.863 |
| rs1064213 | 2 | 198950240 | A | G | 0.476968 | 0.016189 | 0.0024056 | 1.70E-11 | 1.35E-04 | 45.288 |
| rs10749233 | 10 | 118777998 | C | G | 0.75947 | -0.018964 | 0.0028477 | 2.75E-11 | 1.32E-04 | 44.347 |
| rs10788493 | 10 | 88104837 | T | C | 0.45676 | 0.0136921 | 0.0024199 | 1.53E-08 | 9.52E-05 | 32.014 |
| rs10803762 | 2 | 161105876 | A | G | 0.678865 | 0.0154637 | 0.0025818 | 2.11E-09 | 1.07E-04 | 35.874 |
| rs10805383 | 5 | 63034606 | A | G | 0.479558 | 0.0169488 | 0.0024089 | 1.99E-12 | 1.47E-04 | 49.502 |
| rs10865612 | 3 | 85868529 | C | T | 0.354736 | -0.023084 | 0.0025108 | 3.80E-20 | 2.51E-04 | 84.531 |
| rs10898330 | 11 | 84630335 | T | C | 0.525392 | -0.014287 | 0.0024166 | 3.39E-09 | 1.04E-04 | 34.949 |
| rs10938397 | 4 | 45182527 | G | A | 0.434075 | 0.0289533 | 0.0024291 | 9.55E-33 | 4.23E-04 | 142.067 |
| rs10995427 | 10 | 64842838 | A | G | 0.360827 | -0.016531 | 0.0025157 | 5.00E-11 | 1.28E-04 | 43.18 |
| rs11012732 | 10 | 21830104 | G | A | 0.331106 | 0.0238495 | 0.0025551 | 1.03E-20 | 2.59E-04 | 87.122 |
| rs11078883 | 17 | 2138828 | G | C | 0.34744 | 0.0156785 | 0.0025322 | 5.96E-10 | 1.14E-04 | 38.335 |
| rs11084554 | 19 | 31019807 | A | G | 0.156586 | -0.021578 | 0.0033044 | 6.58E-11 | 1.27E-04 | 42.642 |
| rs11099020 | 4 | 130724902 | T | C | 0.642739 | -0.01532 | 0.0025117 | 1.06E-09 | 1.11E-04 | 37.205 |
| rs11150745 | 17 | 78757626 | G | A | 0.319489 | -0.020984 | 0.0025795 | 4.13E-16 | 1.97E-04 | 66.179 |
| rs111640872 | 19 | 30290357 | C | G | 0.331076 | 0.0206225 | 0.002559 | 7.72E-16 | 1.93E-04 | 64.947 |
| rs11223641 | 11 | 133820022 | C | T | 0.144615 | -0.019101 | 0.0034317 | 2.61E-08 | 9.22E-05 | 30.98 |
| rs112520079 | 8 | 95594425 | G | T | 0.198951 | 0.0204582 | 0.0030141 | 1.14E-11 | 1.37E-04 | 46.069 |
| rs11264489 | 1 | 156480831 | G | A | 0.361994 | 0.0140849 | 0.0025071 | 1.93E-08 | 9.39E-05 | 31.563 |
| rs112693590 | 19 | 46274553 | A | G | 0.0497066 | -0.03292 | 0.0056799 | 6.80E-09 | 9.99E-05 | 33.591 |
| rs1127100 | 1 | 32193647 | C | T | 0.648239 | 0.0164916 | 0.002522 | 6.20E-11 | 1.27E-04 | 42.76 |
| rs113182412 | 15 | 66503584 | A | G | 0.165919 | -0.019371 | 0.0032843 | 3.68E-09 | 1.03E-04 | 34.786 |
| rs113230003 | 19 | 18460956 | A | G | 0.260185 | -0.019781 | 0.0027591 | 7.56E-13 | 1.53E-04 | 51.397 |
| rs113603865 | 1 | 39564930 | T | C | 0.212428 | 0.0197498 | 0.0029573 | 2.42E-11 | 1.33E-04 | 44.6 |
| rs11515071 | 9 | 15855545 | T | C | 0.365135 | -0.02281 | 0.0025058 | 8.84E-20 | 2.46E-04 | 82.862 |
| rs11650012 | 17 | 52927879 | A | T | 0.169618 | 0.018609 | 0.0032183 | 7.37E-09 | 9.95E-05 | 33.435 |
| rs11655587 | 17 | 47140794 | T | C | 0.359868 | -0.019638 | 0.0025109 | 5.26E-15 | 1.82E-04 | 61.167 |
| rs11742930 | 5 | 105774098 | T | C | 0.566428 | 0.0143076 | 0.0024287 | 3.84E-09 | 1.03E-04 | 34.705 |
| rs11757278 | 6 | 13180454 | C | T | 0.305848 | -0.015792 | 0.0026088 | 1.42E-09 | 1.09E-04 | 36.643 |
| rs11761411 | 7 | 39303649 | T | C | 0.154361 | -0.018476 | 0.0033399 | 3.17E-08 | 9.10E-05 | 30.601 |
| rs117632017 | 15 | 52260107 | A | G | 0.0391416 | 0.0363818 | 0.0064467 | 1.67E-08 | 9.48E-05 | 31.849 |
| rs11782074 | 8 | 142617096 | T | G | 0.385641 | 0.0144947 | 0.0025067 | 7.37E-09 | 9.95E-05 | 33.435 |
| rs11856579 | 15 | 78012688 | A | G | 0.268192 | -0.019791 | 0.0027115 | 2.91E-13 | 1.58E-04 | 53.274 |
| rs12024554 | 1 | 19925759 | T | C | 0.236905 | -0.016268 | 0.0028275 | 8.75E-09 | 9.85E-05 | 33.101 |
| rs12042959 | 1 | 243533273 | G | A | 0.145777 | -0.020556 | 0.0034251 | 1.96E-09 | 1.07E-04 | 36.019 |
| rs12049202 | 1 | 77967523 | T | C | 0.198651 | 0.0218362 | 0.0030082 | 3.91E-13 | 1.57E-04 | 52.69 |
| rs12140153 | 1 | 62579891 | T | G | 0.0967607 | -0.031825 | 0.0041678 | 2.25E-14 | 1.73E-04 | 58.306 |
| rs12144626 | 1 | 47670525 | C | T | 0.581821 | -0.017214 | 0.0024439 | 1.87E-12 | 1.48E-04 | 49.616 |
| rs12422552 | 12 | 14413931 | C | G | 0.267673 | -0.016192 | 0.0027219 | 2.70E-09 | 1.05E-04 | 35.387 |
| rs12477385 | 2 | 166144850 | T | G | 0.2273 | -0.01725 | 0.0028758 | 1.99E-09 | 1.07E-04 | 35.981 |
| rs12479357 | 2 | 181570507 | G | A | 0.631081 | 0.0178651 | 0.0024987 | 8.71E-13 | 1.52E-04 | 51.118 |
| rs12614861 | 2 | 175047184 | T | G | 0.34701 | 0.0152338 | 0.0025218 | 1.53E-09 | 1.09E-04 | 36.492 |
| rs12622280 | 2 | 79515954 | G | T | 0.157075 | -0.018701 | 0.0033053 | 1.53E-08 | 9.52E-05 | 32.011 |
| rs12662900 | 6 | 97757782 | A | T | 0.282225 | -0.016859 | 0.002673 | 2.85E-10 | 1.18E-04 | 39.777 |
| rs12679106 | 8 | 73443198 | T | G | 0.711341 | -0.02203 | 0.0026649 | 1.38E-16 | 2.03E-04 | 68.338 |
| rs12681792 | 8 | 62054463 | A | C | 0.193805 | 0.0179459 | 0.0030477 | 3.90E-09 | 1.03E-04 | 34.673 |
| rs1286138 | 14 | 91485445 | G | T | 0.673439 | 0.0180512 | 0.0025641 | 1.92E-12 | 1.47E-04 | 49.563 |
| rs12877270 | 13 | 97047020 | A | G | 0.43845 | 0.0169078 | 0.002439 | 4.15E-12 | 1.43E-04 | 48.057 |
| rs12881629 | 14 | 101146413 | G | A | 0.0821459 | 0.0239675 | 0.0043663 | 4.04E-08 | 8.96E-05 | 30.132 |
| rs12885458 | 14 | 47303114 | G | T | 0.509982 | -0.015611 | 0.0024041 | 8.40E-11 | 1.25E-04 | 42.164 |
| rs1296328 | 4 | 137083193 | C | A | 0.559914 | -0.018979 | 0.0024309 | 5.86E-15 | 1.81E-04 | 60.955 |
| rs12992672 | 2 | 632592 | A | G | 0.828635 | 0.0507808 | 0.0031825 | 2.70E-57 | 7.57E-04 | 254.609 |
| rs13062093 | 3 | 35667057 | G | T | 0.366444 | 0.01706 | 0.0024907 | 7.42E-12 | 1.40E-04 | 46.915 |
| rs13076052 | 3 | 44456573 | G | C | 0.277037 | 0.0160769 | 0.0027011 | 2.65E-09 | 1.05E-04 | 35.426 |
| rs13135092 | 4 | 103198082 | G | A | 0.0832342 | 0.0500549 | 0.0043745 | 2.60E-30 | 3.89E-04 | 130.931 |
| rs13174863 | 5 | 139080745 | G | A | 0.148208 | 0.0249793 | 0.0034013 | 2.08E-13 | 1.60E-04 | 53.934 |
| rs1320903 | 3 | 131758077 | A | G | 0.318441 | 0.022008 | 0.0025813 | 1.52E-17 | 2.16E-04 | 72.694 |
| rs1327259 | 6 | 51177811 | G | A | 0.38613 | -0.014003 | 0.0024753 | 1.54E-08 | 9.52E-05 | 32.001 |
| rs1342391 | 1 | 96285385 | T | G | 0.669963 | 0.0158687 | 0.0025615 | 5.83E-10 | 1.14E-04 | 38.379 |
| rs13427822 | 2 | 213414265 | G | A | 0.272052 | -0.019899 | 0.0027287 | 3.05E-13 | 1.58E-04 | 53.18 |
| rs1411432 | 9 | 16728532 | C | A | 0.183895 | 0.0249455 | 0.0031086 | 1.02E-15 | 1.92E-04 | 64.395 |
| rs1412239 | 9 | 28425515 | G | C | 0.324541 | 0.0239207 | 0.0025627 | 1.02E-20 | 2.59E-04 | 87.128 |
| rs1441264 | 13 | 79580919 | A | G | 0.591866 | 0.0206382 | 0.0024967 | 1.39E-16 | 2.03E-04 | 68.331 |
| rs1446585 | 2 | 136407479 | G | A | 0.228006 | -0.017112 | 0.0028767 | 2.71E-09 | 1.05E-04 | 35.386 |
| rs1458156 | 12 | 41887940 | T | C | 0.488264 | 0.0137851 | 0.0024053 | 9.99E-09 | 9.77E-05 | 32.846 |
| rs1471740 | 3 | 136328270 | C | T | 0.741159 | 0.0207316 | 0.0027475 | 4.51E-14 | 1.69E-04 | 56.935 |
| rs1477290 | 5 | 87988934 | C | T | 0.135362 | 0.0335389 | 0.0035371 | 2.51E-21 | 2.67E-04 | 89.911 |
| rs147730268 | 12 | 123024476 | T | G | 0.0905299 | -0.036112 | 0.0043294 | 7.38E-17 | 2.07E-04 | 69.575 |
| rs1582931 | 5 | 122657199 | A | G | 0.472057 | -0.014864 | 0.002426 | 8.97E-10 | 1.12E-04 | 37.538 |
| rs16846140 | 2 | 212292521 | G | A | 0.33821 | 0.0161898 | 0.0025442 | 1.98E-10 | 1.20E-04 | 40.493 |
| rs16916303 | 9 | 30823761 | G | A | 0.119234 | -0.020719 | 0.0037391 | 3.01E-08 | 9.13E-05 | 30.705 |
| rs16975459 | 18 | 39548277 | C | A | 0.121305 | 0.0239721 | 0.0036858 | 7.84E-11 | 1.26E-04 | 42.3 |
| rs17014332 | 1 | 209520450 | C | T | 0.210609 | 0.0180292 | 0.0029442 | 9.16E-10 | 1.12E-04 | 37.498 |
| rs17024393 | 1 | 110154688 | C | T | 0.0257993 | 0.0675077 | 0.0075983 | 6.45E-19 | 2.35E-04 | 78.935 |
| rs170553 | 1 | 210224614 | A | G | 0.419884 | -0.014437 | 0.0024342 | 3.01E-09 | 1.05E-04 | 35.178 |
| rs17058884 | 9 | 71527774 | G | T | 0.0450046 | -0.031826 | 0.0058085 | 4.27E-08 | 8.93E-05 | 30.022 |
| rs17085463 | 4 | 65740387 | A | G | 0.317007 | -0.014814 | 0.0025982 | 1.19E-08 | 9.67E-05 | 32.508 |
| rs17132130 | 7 | 2108036 | C | G | 0.219446 | -0.022521 | 0.0029116 | 1.04E-14 | 1.78E-04 | 59.83 |
| rs17399739 | 10 | 87490850 | G | A | 0.0695257 | 0.026237 | 0.0047224 | 2.76E-08 | 9.18E-05 | 30.868 |
| rs17716502 | 8 | 116659731 | T | C | 0.207243 | -0.0223 | 0.002986 | 8.16E-14 | 1.66E-04 | 55.772 |
| rs1788808 | 18 | 21090023 | G | A | 0.497341 | -0.018314 | 0.0024054 | 2.67E-14 | 1.72E-04 | 57.965 |
| rs1884897 | 20 | 6612832 | G | A | 0.628254 | 0.0213286 | 0.0024922 | 1.15E-17 | 2.18E-04 | 73.239 |
| rs1886558 | 13 | 111982615 | G | A | 0.606793 | -0.016977 | 0.0024818 | 7.89E-12 | 1.39E-04 | 46.795 |
| rs1901241 | 12 | 97941390 | G | A | 0.160137 | 0.0192919 | 0.0032902 | 4.54E-09 | 1.02E-04 | 34.38 |
| rs1915792 | 8 | 64703342 | T | C | 0.475384 | -0.014272 | 0.00241 | 3.19E-09 | 1.04E-04 | 35.068 |
| rs1919243 | 5 | 88778861 | C | T | 0.487067 | 0.0138729 | 0.0024334 | 1.19E-08 | 9.67E-05 | 32.501 |
| rs1941706 | 18 | 31223776 | G | A | 0.463511 | 0.0139405 | 0.0024107 | 7.36E-09 | 9.95E-05 | 33.439 |
| rs1949204 | 13 | 65475834 | G | T | 0.761765 | 0.0166526 | 0.0028194 | 3.50E-09 | 1.04E-04 | 34.887 |
| rs2035806 | 10 | 133984916 | A | G | 0.566354 | -0.016631 | 0.0024284 | 7.47E-12 | 1.40E-04 | 46.904 |
| rs2046002 | 15 | 95272235 | C | T | 0.639044 | -0.014571 | 0.0025078 | 6.24E-09 | 1.00E-04 | 33.76 |
| rs2083226 | 19 | 1948476 | T | C | 0.82915 | 0.0191588 | 0.0031967 | 2.06E-09 | 1.07E-04 | 35.921 |
| rs2121058 | 13 | 58627256 | C | T | 0.228644 | -0.023815 | 0.0028608 | 8.49E-17 | 2.06E-04 | 69.299 |
| rs2135745 | 9 | 109150784 | G | C | 0.753229 | -0.016838 | 0.0028013 | 1.85E-09 | 1.07E-04 | 36.13 |
| rs215634 | 7 | 32369148 | G | A | 0.613873 | -0.014767 | 0.0024758 | 2.45E-09 | 1.06E-04 | 35.579 |
| rs217672 | 14 | 62361021 | C | A | 0.272013 | 0.0158661 | 0.0027056 | 4.52E-09 | 1.02E-04 | 34.388 |
| rs2186120 | 1 | 66453163 | A | G | 0.531452 | 0.0142511 | 0.0024225 | 4.04E-09 | 1.03E-04 | 34.607 |
| rs2192649 | 7 | 78126279 | G | T | 0.497183 | 0.0136694 | 0.0024162 | 1.54E-08 | 9.52E-05 | 32.007 |
| rs2234458 | 11 | 65639374 | T | C | 0.639151 | -0.020641 | 0.002496 | 1.35E-16 | 2.03E-04 | 68.386 |
| rs2292238 | 12 | 56493822 | C | A | 0.408667 | -0.017698 | 0.0024477 | 4.83E-13 | 1.56E-04 | 52.279 |
| rs2307111 | 5 | 75003678 | C | T | 0.393183 | -0.028952 | 0.0024618 | 6.35E-32 | 4.11E-04 | 138.301 |
| rs2318543 | 4 | 67803263 | G | A | 0.782495 | -0.019402 | 0.0029216 | 3.12E-11 | 1.31E-04 | 44.101 |
| rs2384054 | 2 | 25156773 | C | T | 0.489674 | 0.0350265 | 0.0024001 | 3.18E-48 | 6.33E-04 | 212.982 |
| rs2398861 | 9 | 96430747 | G | A | 0.256599 | 0.0220894 | 0.0027614 | 1.25E-15 | 1.90E-04 | 63.989 |
| rs241460 | 1 | 49782772 | G | A | 0.68187 | -0.020539 | 0.0025753 | 1.52E-15 | 1.89E-04 | 63.608 |
| rs2425857 | 20 | 44914134 | G | A | 0.554635 | -0.013595 | 0.0024162 | 1.84E-08 | 9.42E-05 | 31.656 |
| rs2439823 | 10 | 99778226 | G | A | 0.547705 | 0.0216364 | 0.0024194 | 3.81E-19 | 2.38E-04 | 79.975 |
| rs2450254 | 11 | 69449784 | T | A | 0.415003 | -0.014067 | 0.0024431 | 8.53E-09 | 9.86E-05 | 33.153 |
| rs2450445 | 10 | 93038530 | A | G | 0.323973 | -0.015366 | 0.0025626 | 2.02E-09 | 1.07E-04 | 35.952 |
| rs245775 | 5 | 170532105 | G | A | 0.728826 | 0.0203304 | 0.0027049 | 5.65E-14 | 1.68E-04 | 56.492 |
| rs2470392 | 12 | 2155430 | C | T | 0.287428 | 0.0145453 | 0.0026598 | 4.54E-08 | 8.90E-05 | 29.906 |
| rs2474898 | 6 | 51769245 | T | C | 0.345803 | 0.0146104 | 0.0025232 | 7.03E-09 | 9.97E-05 | 33.529 |
| rs2482704 | 9 | 94182363 | T | G | 0.423422 | -0.013825 | 0.0024316 | 1.30E-08 | 9.62E-05 | 32.328 |
| rs2606228 | 3 | 183537759 | C | A | 0.642769 | -0.015571 | 0.0025362 | 8.29E-10 | 1.12E-04 | 37.692 |
| rs2616192 | 8 | 20668624 | T | G | 0.67249 | 0.0140763 | 0.0025723 | 4.45E-08 | 8.91E-05 | 29.945 |
| rs2678204 | 1 | 201800511 | G | T | 0.341813 | 0.0280873 | 0.0025358 | 1.65E-28 | 3.65E-04 | 122.686 |
| rs2711111 | 7 | 24529055 | G | A | 0.565043 | -0.014716 | 0.0024573 | 2.12E-09 | 1.07E-04 | 35.861 |
| rs2725371 | 8 | 30854033 | G | A | 0.696308 | -0.018088 | 0.0026206 | 5.12E-12 | 1.42E-04 | 47.643 |
| rs273505 | 19 | 18217147 | C | T | 0.419906 | 0.0188626 | 0.0024341 | 9.27E-15 | 1.79E-04 | 60.05 |
| rs28366156 | 6 | 31671498 | C | T | 0.131356 | -0.029003 | 0.0035558 | 3.46E-16 | 1.98E-04 | 66.527 |
| rs28447555 | 3 | 107385668 | T | C | 0.180987 | 0.0185076 | 0.003128 | 3.29E-09 | 1.04E-04 | 35.008 |
| rs28489620 | 22 | 41804716 | A | G | 0.290982 | -0.014733 | 0.0026634 | 3.18E-08 | 9.10E-05 | 30.598 |
| rs2861685 | 2 | 67837553 | C | T | 0.411371 | -0.017647 | 0.0024376 | 4.52E-13 | 1.56E-04 | 52.409 |
| rs286818 | 5 | 107433446 | A | T | 0.170248 | -0.029145 | 0.0032042 | 9.41E-20 | 2.46E-04 | 82.738 |
| rs2962082 | 16 | 62816628 | A | G | 0.482549 | -0.013538 | 0.0024075 | 1.88E-08 | 9.41E-05 | 31.618 |
| rs2975693 | 8 | 10114474 | C | T | 0.109281 | 0.0238256 | 0.0038753 | 7.85E-10 | 1.12E-04 | 37.798 |
| rs34045288 | 6 | 40369081 | T | C | 0.335903 | 0.0259978 | 0.0025451 | 1.72E-24 | 3.10E-04 | 104.342 |
| rs34095326 | 19 | 45395844 | A | G | 0.114134 | -0.024443 | 0.0037924 | 1.16E-10 | 1.24E-04 | 41.542 |
| rs34361149 | 1 | 72750470 | A | G | 0.19259 | -0.030994 | 0.0030451 | 2.50E-24 | 3.08E-04 | 103.594 |
| rs34373881 | 3 | 20432033 | A | G | 0.278276 | -0.016886 | 0.0026868 | 3.28E-10 | 1.18E-04 | 39.5 |
| rs34774377 | 5 | 167001890 | C | T | 0.120337 | -0.020843 | 0.003691 | 1.63E-08 | 9.49E-05 | 31.89 |
| rs34811474 | 4 | 25408838 | A | G | 0.231875 | -0.030598 | 0.0028434 | 5.30E-27 | 3.44E-04 | 115.802 |
| rs34966008 | 17 | 34919623 | T | C | 0.408148 | -0.019916 | 0.0024431 | 3.59E-16 | 1.98E-04 | 66.455 |
| rs35020117 | 14 | 73341655 | G | T | 0.464666 | -0.013585 | 0.0024847 | 4.57E-08 | 8.89E-05 | 29.894 |
| rs35025195 | 11 | 134522597 | A | G | 0.166132 | -0.023048 | 0.0032301 | 9.68E-13 | 1.51E-04 | 50.912 |
| rs35193668 | 13 | 33092929 | T | C | 0.361915 | -0.016676 | 0.0025 | 2.55E-11 | 1.32E-04 | 44.495 |
| rs35483388 | 11 | 122545146 | T | C | 0.379617 | 0.0140802 | 0.002486 | 1.48E-08 | 9.54E-05 | 32.078 |
| rs35626515 | 16 | 28649651 | A | C | 0.407965 | 0.0265699 | 0.0024455 | 1.71E-27 | 3.51E-04 | 118.046 |
| rs35722922 | 2 | 47002226 | G | A | 0.385007 | -0.016462 | 0.0024782 | 3.08E-11 | 1.31E-04 | 44.126 |
| rs35746614 | 3 | 108011037 | C | T | 0.301943 | -0.014349 | 0.0026158 | 4.13E-08 | 8.95E-05 | 30.09 |
| rs357501 | 3 | 153953440 | A | G | 0.377514 | 0.0154044 | 0.0024909 | 6.24E-10 | 1.14E-04 | 38.246 |
| rs35851183 | 4 | 80717182 | G | A | 0.357777 | 0.0167614 | 0.0025085 | 2.36E-11 | 1.33E-04 | 44.646 |
| rs35882248 | 2 | 230627955 | T | C | 0.314642 | 0.0192316 | 0.0025895 | 1.11E-13 | 1.64E-04 | 55.158 |
| rs36007635 | 6 | 163009335 | A | G | 0.138403 | -0.02 | 0.0034815 | 9.21E-09 | 9.82E-05 | 33.003 |
| rs362307 | 4 | 3241845 | T | C | 0.0760278 | 0.0313537 | 0.0045816 | 7.74E-12 | 1.39E-04 | 46.832 |
| rs3759584 | 14 | 103990799 | C | T | 0.361958 | -0.016584 | 0.0025139 | 4.20E-11 | 1.29E-04 | 43.519 |
| rs3802858 | 11 | 115078492 | C | T | 0.427488 | -0.016471 | 0.0024301 | 1.22E-11 | 1.37E-04 | 45.943 |
| rs3803286 | 14 | 103246470 | G | A | 0.666379 | -0.020791 | 0.0025447 | 3.08E-16 | 1.99E-04 | 66.756 |
| rs3810291 | 19 | 47569003 | A | G | 0.677478 | 0.029685 | 0.0025676 | 6.54E-31 | 3.98E-04 | 133.67 |
| rs3843540 | 7 | 99126640 | C | T | 0.148581 | -0.024173 | 0.0033823 | 8.89E-13 | 1.52E-04 | 51.079 |
| rs3844598 | 5 | 140992235 | G | A | 0.528663 | 0.0136986 | 0.0024101 | 1.32E-08 | 9.61E-05 | 32.307 |
| rs3861879 | 9 | 129464856 | G | A | 0.43683 | 0.0137348 | 0.0024314 | 1.62E-08 | 9.49E-05 | 31.911 |
| rs3897102 | 12 | 123492112 | T | C | 0.412248 | 0.0147261 | 0.0024596 | 2.14E-09 | 1.07E-04 | 35.847 |
| rs390192 | 6 | 83359135 | G | A | 0.522445 | -0.015442 | 0.0024207 | 1.78E-10 | 1.21E-04 | 40.693 |
| rs4246657 | 2 | 229006134 | T | C | 0.340914 | 0.0170056 | 0.0025342 | 1.94E-11 | 1.34E-04 | 45.029 |
| rs4261944 | 4 | 31003636 | G | T | 0.362956 | 0.0154894 | 0.0025044 | 6.22E-10 | 1.14E-04 | 38.252 |
| rs4402589 | 16 | 29954654 | G | T | 0.55278 | 0.0291524 | 0.0024167 | 1.68E-33 | 4.33E-04 | 145.515 |
| rs4467770 | 6 | 12086826 | A | G | 0.730668 | 0.0156691 | 0.0027169 | 8.07E-09 | 9.89E-05 | 33.26 |
| rs4474229 | 1 | 195037001 | A | G | 0.372338 | -0.015878 | 0.0024833 | 1.62E-10 | 1.22E-04 | 40.878 |
| rs4482463 | 2 | 205375909 | A | C | 0.924181 | -0.034086 | 0.0045452 | 6.43E-14 | 1.67E-04 | 56.239 |
| rs4502882 | 5 | 153093998 | T | C | 0.656893 | -0.014718 | 0.0025291 | 5.91E-09 | 1.01E-04 | 33.866 |
| rs4595495 | 10 | 53673286 | G | A | 0.422607 | 0.0137384 | 0.0024356 | 1.70E-08 | 9.47E-05 | 31.817 |
| rs4648450 | 1 | 2723214 | A | C | 0.466133 | -0.015437 | 0.0024221 | 1.85E-10 | 1.21E-04 | 40.622 |
| rs4671328 | 2 | 58935282 | G | T | 0.552555 | -0.021772 | 0.0024348 | 3.84E-19 | 2.38E-04 | 79.959 |
| rs4687770 | 3 | 51755065 | C | T | 0.133375 | -0.019339 | 0.0035355 | 4.50E-08 | 8.90E-05 | 29.92 |
| rs4718964 | 7 | 70038969 | T | G | 0.412194 | 0.0145653 | 0.0024468 | 2.64E-09 | 1.05E-04 | 35.436 |
| rs4722398 | 7 | 3125220 | T | C | 0.135663 | 0.0203493 | 0.0034973 | 5.94E-09 | 1.01E-04 | 33.855 |
| rs4757144 | 11 | 13331226 | A | G | 0.593047 | 0.016524 | 0.0024459 | 1.42E-11 | 1.36E-04 | 45.642 |
| rs4776970 | 15 | 68080886 | T | A | 0.35707 | -0.025463 | 0.0025051 | 2.89E-24 | 3.07E-04 | 103.311 |
| rs4777541 | 15 | 73082240 | T | C | 0.765041 | 0.0196505 | 0.0028464 | 5.08E-12 | 1.42E-04 | 47.659 |
| rs4911382 | 20 | 32553095 | T | C | 0.584238 | 0.015559 | 0.0024429 | 1.90E-10 | 1.21E-04 | 40.566 |
| rs491711 | 11 | 28742220 | C | A | 0.310988 | -0.01584 | 0.0026094 | 1.28E-09 | 1.10E-04 | 36.851 |
| rs4921301 | 5 | 159984492 | T | C | 0.209817 | -0.018224 | 0.0029841 | 1.02E-09 | 1.11E-04 | 37.295 |
| rs4929923 | 11 | 8639200 | C | T | 0.647328 | 0.0173844 | 0.0025107 | 4.39E-12 | 1.43E-04 | 47.944 |
| rs539515 | 1 | 177889025 | C | A | 0.207529 | 0.0474871 | 0.0029599 | 6.64E-58 | 7.65E-04 | 257.4 |
| rs550974 | 11 | 118937106 | T | A | 0.404297 | 0.0158904 | 0.0024481 | 8.55E-11 | 1.25E-04 | 42.131 |
| rs55689274 | 15 | 47758909 | A | G | 0.285711 | -0.014834 | 0.0026627 | 2.53E-08 | 9.23E-05 | 31.038 |
| rs55726687 | 12 | 991306 | A | G | 0.211138 | 0.0238631 | 0.0029425 | 5.09E-16 | 1.96E-04 | 65.769 |
| rs55886426 | 20 | 62567684 | G | C | 0.0554317 | -0.031643 | 0.0055191 | 9.86E-09 | 9.78E-05 | 32.871 |
| rs55938344 | 12 | 108310327 | C | A | 0.242702 | -0.016821 | 0.0028182 | 2.39E-09 | 1.06E-04 | 35.626 |
| rs56067609 | 7 | 133582465 | T | A | 0.136594 | -0.019364 | 0.0035019 | 3.21E-08 | 9.10E-05 | 30.575 |
| rs56161855 | 17 | 46288649 | T | A | 0.132008 | 0.0229722 | 0.0035492 | 9.65E-11 | 1.25E-04 | 41.894 |
| rs56212061 | 19 | 19394640 | T | C | 0.149969 | -0.021112 | 0.0033734 | 3.89E-10 | 1.17E-04 | 39.169 |
| rs56773984 | 2 | 220177285 | T | A | 0.16742 | -0.017917 | 0.0032318 | 2.96E-08 | 9.14E-05 | 30.737 |
| rs56803094 | 15 | 99222509 | G | A | 0.227111 | -0.018882 | 0.0028741 | 5.04E-11 | 1.28E-04 | 43.162 |
| rs57636386 | 18 | 58048295 | C | T | 0.0834151 | -0.042765 | 0.0043531 | 8.92E-23 | 2.87E-04 | 96.513 |
| rs58862095 | 7 | 75081418 | T | C | 0.419757 | -0.02438 | 0.0024397 | 1.65E-23 | 2.97E-04 | 99.861 |
| rs588660 | 1 | 96886604 | A | G | 0.585856 | 0.0183012 | 0.002441 | 6.52E-14 | 1.67E-04 | 56.213 |
| rs59104534 | 8 | 25666169 | T | C | 0.301112 | 0.0149782 | 0.002629 | 1.22E-08 | 9.66E-05 | 32.458 |
| rs5995843 | 22 | 40697377 | G | A | 0.348993 | -0.017441 | 0.0025193 | 4.43E-12 | 1.43E-04 | 47.929 |
| rs6050446 | 20 | 25195509 | G | A | 0.966803 | 0.0420771 | 0.0067598 | 4.83E-10 | 1.15E-04 | 38.746 |
| rs60654199 | 3 | 141267295 | A | C | 0.0666476 | 0.0312664 | 0.00481 | 8.03E-11 | 1.26E-04 | 42.253 |
| rs60764613 | 18 | 1839911 | T | G | 0.144857 | 0.023587 | 0.0034265 | 5.84E-12 | 1.41E-04 | 47.386 |
| rs61813324 | 1 | 156049877 | T | C | 0.134883 | 0.0279187 | 0.0035631 | 4.69E-15 | 1.83E-04 | 61.393 |
| rs61826867 | 1 | 174377435 | G | A | 0.109772 | 0.0251347 | 0.0038417 | 6.05E-11 | 1.27E-04 | 42.806 |
| rs61871615 | 10 | 102487140 | T | C | 0.0905228 | -0.028025 | 0.0043732 | 1.47E-10 | 1.22E-04 | 41.068 |
| rs61903695 | 11 | 89922417 | G | A | 0.255999 | 0.0163585 | 0.002752 | 2.78E-09 | 1.05E-04 | 35.333 |
| rs61969510 | 13 | 86484025 | C | T | 0.284412 | 0.0155328 | 0.002695 | 8.25E-09 | 9.88E-05 | 33.217 |
| rs62106258 | 2 | 417167 | C | T | 0.0484669 | -0.090693 | 0.0055919 | 3.93E-59 | 7.82E-04 | 263.04 |
| rs62147189 | 2 | 86807853 | G | T | 0.622 | -0.017007 | 0.0025132 | 1.32E-11 | 1.36E-04 | 45.792 |
| rs62246314 | 3 | 9504099 | A | G | 0.101276 | 0.0228001 | 0.0039806 | 1.02E-08 | 9.76E-05 | 32.807 |
| rs62407562 | 6 | 33530346 | A | T | 0.268967 | 0.0170851 | 0.0027095 | 2.87E-10 | 1.18E-04 | 39.762 |
| rs62543438 | 9 | 73896870 | C | G | 0.271966 | -0.014801 | 0.0027001 | 4.22E-08 | 8.94E-05 | 30.048 |
| rs6265 | 11 | 27679916 | T | C | 0.189726 | -0.040228 | 0.0030619 | 2.04E-39 | 5.13E-04 | 172.607 |
| rs6536575 | 4 | 162091639 | C | T | 0.518496 | 0.0140621 | 0.0024045 | 4.97E-09 | 1.02E-04 | 34.201 |
| rs6575340 | 14 | 94023972 | A | G | 0.637416 | 0.0228776 | 0.002504 | 6.48E-20 | 2.48E-04 | 83.476 |
| rs6601527 | 8 | 10665444 | A | C | 0.587819 | -0.021738 | 0.0024455 | 6.18E-19 | 2.35E-04 | 79.019 |
| rs66679256 | 4 | 18351898 | T | C | 0.446142 | 0.0162973 | 0.0024217 | 1.70E-11 | 1.35E-04 | 45.29 |
| rs6687953 | 1 | 112293512 | G | A | 0.391351 | 0.0158953 | 0.0024614 | 1.06E-10 | 1.24E-04 | 41.703 |
| rs66922415 | 18 | 57848651 | G | A | 0.234362 | 0.0520958 | 0.002832 | 1.55E-75 | 0.001 | 338.399 |
| rs6705567 | 2 | 55320173 | C | T | 0.3788 | -0.013622 | 0.0024954 | 4.79E-08 | 8.87E-05 | 29.801 |
| rs6722241 | 2 | 100803778 | C | T | 0.270908 | -0.020171 | 0.0027136 | 1.06E-13 | 1.64E-04 | 55.254 |
| rs6739755 | 2 | 59330227 | G | A | 0.602976 | -0.020959 | 0.0024605 | 1.62E-17 | 2.16E-04 | 72.564 |
| rs67609008 | 10 | 126640936 | C | T | 0.283597 | 0.0146011 | 0.0026744 | 4.78E-08 | 8.87E-05 | 29.806 |
| rs6780459 | 3 | 104624105 | T | A | 0.746681 | 0.0163597 | 0.0027623 | 3.18E-09 | 1.04E-04 | 35.075 |
| rs67844506 | 20 | 51103807 | G | A | 0.183242 | -0.025916 | 0.0031086 | 7.65E-17 | 2.07E-04 | 69.504 |
| rs6809307 | 3 | 156862041 | T | C | 0.25622 | 0.0157072 | 0.0027603 | 1.27E-08 | 9.63E-05 | 32.38 |
| rs6831020 | 4 | 55500226 | A | C | 0.295229 | -0.015937 | 0.002631 | 1.39E-09 | 1.09E-04 | 36.691 |
| rs6861649 | 5 | 50864788 | C | T | 0.607485 | 0.0143476 | 0.0024693 | 6.23E-09 | 1.00E-04 | 33.761 |
| rs6950388 | 7 | 1270699 | A | G | 0.795004 | 0.0172281 | 0.0029762 | 7.10E-09 | 9.97E-05 | 33.509 |
| rs7006178 | 8 | 14252384 | C | G | 0.287875 | 0.0155041 | 0.0026587 | 5.50E-09 | 1.01E-04 | 34.005 |
| rs7030732 | 9 | 124630006 | A | C | 0.607889 | -0.015161 | 0.002459 | 7.04E-10 | 1.13E-04 | 38.01 |
| rs704061 | 12 | 89771903 | C | T | 0.452703 | 0.0158698 | 0.0024138 | 4.88E-11 | 1.29E-04 | 43.225 |
| rs7094644 | 10 | 16773864 | A | G | 0.674176 | 0.0152821 | 0.0026106 | 4.81E-09 | 1.02E-04 | 34.268 |
| rs7116641 | 11 | 43696917 | G | T | 0.316797 | 0.0244218 | 0.0025865 | 3.67E-21 | 2.65E-04 | 89.155 |
| rs7124681 | 11 | 47529947 | A | C | 0.408057 | 0.0267462 | 0.00244 | 5.90E-28 | 3.57E-04 | 120.158 |
| rs7132908 | 12 | 50263148 | A | G | 0.38392 | 0.0285337 | 0.0024723 | 8.27E-31 | 3.96E-04 | 133.202 |
| rs7138383 | 12 | 103724090 | A | G | 0.253485 | -0.021381 | 0.0027649 | 1.05E-14 | 1.78E-04 | 59.798 |
| rs7141420 | 14 | 79899454 | T | C | 0.514078 | 0.0208148 | 0.0024192 | 7.74E-18 | 2.20E-04 | 74.027 |
| rs71495049 | 10 | 34014435 | A | G | 0.0840305 | 0.0265499 | 0.0043297 | 8.69E-10 | 1.12E-04 | 37.602 |
| rs7183417 | 15 | 46586088 | T | C | 0.432569 | 0.0149003 | 0.0024276 | 8.37E-10 | 1.12E-04 | 37.673 |
| rs7189149 | 16 | 69144151 | G | C | 0.127107 | 0.0213468 | 0.003608 | 3.29E-09 | 1.04E-04 | 35.006 |
| rs7195386 | 16 | 24578458 | C | T | 0.506441 | -0.015881 | 0.0024075 | 4.21E-11 | 1.29E-04 | 43.516 |
| rs7201895 | 16 | 407723 | A | G | 0.355984 | -0.017337 | 0.0025245 | 6.54E-12 | 1.40E-04 | 47.162 |
| rs7218014 | 17 | 65832016 | C | T | 0.196595 | 0.0206989 | 0.0030271 | 8.05E-12 | 1.39E-04 | 46.756 |
| rs7239114 | 18 | 45921214 | A | G | 0.542958 | 0.0140943 | 0.0024278 | 6.43E-09 | 1.00E-04 | 33.701 |
| rs72697614 | 1 | 107514107 | A | C | 0.320396 | 0.014951 | 0.0026063 | 9.67E-09 | 9.79E-05 | 32.908 |
| rs72820274 | 2 | 104412924 | A | G | 0.41876 | 0.0160021 | 0.0024393 | 5.39E-11 | 1.28E-04 | 43.034 |
| rs72892910 | 6 | 50816887 | T | G | 0.170442 | 0.0401658 | 0.0032043 | 4.89E-36 | 4.67E-04 | 157.128 |
| rs72976986 | 19 | 4050424 | A | G | 0.191187 | -0.024049 | 0.0030879 | 6.81E-15 | 1.80E-04 | 60.658 |
| rs73144053 | 3 | 88085826 | A | C | 0.329919 | -0.015356 | 0.0025605 | 2.01E-09 | 1.07E-04 | 35.967 |
| rs73169730 | 3 | 170734438 | G | A | 0.276291 | 0.0194632 | 0.0026866 | 4.35E-13 | 1.56E-04 | 52.482 |
| rs73213484 | 4 | 28489339 | T | A | 0.139056 | -0.021195 | 0.0034738 | 1.05E-09 | 1.11E-04 | 37.227 |
| rs7331420 | 13 | 99236471 | A | G | 0.284027 | -0.014732 | 0.0026701 | 3.44E-08 | 9.06E-05 | 30.443 |
| rs7442885 | 5 | 87682877 | G | C | 0.210104 | -0.025429 | 0.0029567 | 7.96E-18 | 2.20E-04 | 73.971 |
| rs7498044 | 15 | 92573639 | A | G | 0.218661 | -0.017649 | 0.002932 | 1.75E-09 | 1.08E-04 | 36.233 |
| rs750090 | 4 | 152931436 | C | T | 0.356153 | -0.015634 | 0.0025347 | 6.93E-10 | 1.13E-04 | 38.041 |
| rs75499503 | 6 | 26145217 | T | C | 0.219955 | -0.019784 | 0.0029462 | 1.88E-11 | 1.34E-04 | 45.094 |
| rs7553158 | 1 | 75005238 | A | G | 0.562389 | -0.017415 | 0.0024236 | 6.70E-13 | 1.54E-04 | 51.634 |
| rs75557510 | 3 | 84321469 | G | A | 0.0614963 | -0.037788 | 0.0051041 | 1.33E-13 | 1.63E-04 | 54.812 |
| rs756717 | 16 | 72996162 | A | G | 0.398859 | -0.014672 | 0.0024817 | 3.38E-09 | 1.04E-04 | 34.954 |
| rs7571496 | 2 | 6169351 | G | A | 0.258582 | -0.016398 | 0.0027607 | 2.85E-09 | 1.05E-04 | 35.282 |
| rs76040172 | 21 | 46488959 | A | G | 0.0544397 | -0.040756 | 0.0053083 | 1.62E-14 | 1.75E-04 | 58.95 |
| rs7701777 | 5 | 27178172 | G | T | 0.282759 | -0.017028 | 0.0026678 | 1.74E-10 | 1.21E-04 | 40.74 |
| rs7719067 | 5 | 153538241 | G | A | 0.573835 | -0.016203 | 0.002426 | 2.41E-11 | 1.33E-04 | 44.606 |
| rs7723426 | 5 | 43186097 | C | T | 0.675017 | 0.0146685 | 0.0025659 | 1.09E-08 | 9.72E-05 | 32.681 |
| rs7755574 | 6 | 153364643 | T | G | 0.281153 | 0.0154959 | 0.0026744 | 6.87E-09 | 9.99E-05 | 33.573 |
| rs7774 | 17 | 4801163 | A | C | 0.309138 | 0.0166342 | 0.0026153 | 2.01E-10 | 1.20E-04 | 40.455 |
| rs778094 | 2 | 147903802 | A | G | 0.577568 | -0.014854 | 0.0024367 | 1.09E-09 | 1.11E-04 | 37.157 |
| rs7852189 | 9 | 103121547 | G | A | 0.311364 | 0.0165539 | 0.0025888 | 1.61E-10 | 1.22E-04 | 40.888 |
| rs78565420 | 8 | 85703065 | T | C | 0.0541861 | 0.0337314 | 0.0054543 | 6.24E-10 | 1.14E-04 | 38.246 |
| rs79113395 | 1 | 1590521 | A | G | 0.265449 | -0.020915 | 0.0027324 | 1.95E-14 | 1.74E-04 | 58.591 |
| rs7933085 | 11 | 130796248 | G | A | 0.509195 | 0.0157387 | 0.0024152 | 7.21E-11 | 1.26E-04 | 42.464 |
| rs79348488 | 15 | 80999240 | G | A | 0.292261 | -0.015552 | 0.0026417 | 3.93E-09 | 1.03E-04 | 34.657 |
| rs7942037 | 11 | 30430332 | C | G | 0.359985 | -0.015636 | 0.0024997 | 3.97E-10 | 1.16E-04 | 39.129 |
| rs7952102 | 11 | 892089 | C | T | 0.387339 | -0.015226 | 0.0024655 | 6.59E-10 | 1.13E-04 | 38.141 |
| rs7992832 | 13 | 28013501 | T | C | 0.276544 | -0.017556 | 0.0026924 | 7.02E-11 | 1.26E-04 | 42.517 |
| rs799449 | 7 | 44784697 | T | C | 0.558481 | 0.019902 | 0.002427 | 2.41E-16 | 2.00E-04 | 67.244 |
| rs8015400 | 14 | 25930988 | A | C | 0.678151 | 0.0210882 | 0.0025723 | 2.45E-16 | 2.00E-04 | 67.21 |
| rs80330591 | 2 | 159368720 | A | G | 0.146844 | -0.021361 | 0.0033934 | 3.08E-10 | 1.18E-04 | 39.624 |
| rs8078135 | 17 | 21268583 | T | C | 0.488467 | -0.0195 | 0.0024118 | 6.23E-16 | 1.94E-04 | 65.369 |
| rs8134638 | 21 | 40644170 | C | T | 0.375763 | 0.0151694 | 0.0024808 | 9.68E-10 | 1.11E-04 | 37.39 |
| rs815163 | 1 | 190294726 | C | T | 0.561603 | -0.018246 | 0.0024197 | 4.69E-14 | 1.69E-04 | 56.859 |
| rs845084 | 10 | 125220036 | A | G | 0.257551 | 0.02034 | 0.0027569 | 1.61E-13 | 1.62E-04 | 54.432 |
| rs862320 | 16 | 69651866 | T | C | 0.410152 | -0.022816 | 0.0024463 | 1.10E-20 | 2.59E-04 | 86.985 |
| rs869400 | 3 | 185826740 | G | T | 0.815827 | 0.0307255 | 0.0031072 | 4.70E-23 | 2.91E-04 | 97.783 |
| rs879620 | 16 | 4015729 | T | C | 0.615276 | 0.0256124 | 0.0024782 | 4.93E-25 | 3.18E-04 | 106.814 |
| rs9267671 | 6 | 31880480 | A | G | 0.060402 | 0.0323708 | 0.0050415 | 1.36E-10 | 1.23E-04 | 41.227 |
| rs9320823 | 6 | 98429337 | C | T | 0.601901 | 0.0189398 | 0.0024576 | 1.30E-14 | 1.77E-04 | 59.392 |
| rs9342196 | 6 | 90124635 | T | C | 0.189501 | 0.0167326 | 0.003066 | 4.83E-08 | 8.86E-05 | 29.784 |
| rs9348950 | 6 | 34673678 | A | G | 0.671796 | -0.028823 | 0.0025543 | 1.60E-29 | 3.79E-04 | 127.326 |
| rs935166 | 2 | 26949366 | A | G | 0.506935 | -0.015494 | 0.0024028 | 1.13E-10 | 1.24E-04 | 41.581 |
| rs9402104 | 6 | 129410736 | A | G | 0.584134 | 0.0139016 | 0.0024519 | 1.43E-08 | 9.56E-05 | 32.146 |
| rs946185 | 10 | 76423739 | G | A | 0.593276 | -0.014691 | 0.0024618 | 2.41E-09 | 1.06E-04 | 35.614 |
| rs9506311 | 13 | 31015154 | T | C | 0.740987 | 0.0175662 | 0.002755 | 1.82E-10 | 1.21E-04 | 40.655 |
| rs9515455 | 13 | 112239671 | A | G | 0.416606 | 0.0179637 | 0.0024496 | 2.25E-13 | 1.60E-04 | 53.776 |
| rs9527906 | 13 | 59403551 | A | G | 0.762395 | -0.016181 | 0.0028336 | 1.13E-08 | 9.70E-05 | 32.61 |
| rs9641499 | 7 | 112984493 | A | C | 0.434095 | -0.017102 | 0.0024226 | 1.68E-12 | 1.48E-04 | 49.833 |
| rs9667999 | 12 | 24057750 | C | G | 0.132494 | 0.0196085 | 0.0035408 | 3.06E-08 | 9.12E-05 | 30.668 |
| rs9688977 | 6 | 154336892 | C | T | 0.146486 | 0.0239775 | 0.003406 | 1.93E-12 | 1.47E-04 | 49.558 |
| rs9843653 | 3 | 49920571 | C | T | 0.514555 | 0.0317261 | 0.0024041 | 9.35E-40 | 5.18E-04 | 174.158 |
| rs9847186 | 3 | 25081857 | A | G | 0.427737 | -0.014285 | 0.0024335 | 4.36E-09 | 1.03E-04 | 34.458 |

**Table S3. MR heterogeneity and pleiotropy tests for the associations between BMI and HHD.**

| Exposure | Study | Outcome | Inverse variance weighted | | | | MR Egger | | | | Egger intercept | SE | *P*-value |
| --- | --- | --- | --- | --- | --- | --- | --- | --- | --- | --- | --- | --- | --- |
| **Q** | **DF** | **I2** | ***P*-value** | **Q** | **DF** | **I2** | ***P*-value** |
| BMI | GIANT | HHD | 739.416 | 483 | 34.678 | 4.55E-13 | 739.237 | 482 | 34.798 | 3.78E-13 | -0.000877407 | 0.002568183 | 0.733 |
| BMI | UK Biobank | HHD | 395.552 | 293 | 25.926 | 5.90E-05 | 395.3 | 292 | 26.132 | 5.20E-05 | 0.001576928 | 0.003654926 | 0.666 |

**Table S4. The number of deaths, the DALYs, the ASMR, and the ASDR of HHD caused by high BMI from 1990 to 2021, as well as the percentage changes.**

| Sex/SDI/GBD Region |  | Deaths | | | ASMR | | | DALYs | | | ASDR | | |
| --- | --- | --- | --- | --- | --- | --- | --- | --- | --- | --- | --- | --- | --- |
| Global |  | 1990 | 2021 | %change 1990-2021 | 1990 | 2021 | %change 1990-2021 | 1990 | 2021 | %change 1990-2021 | 1990 | 2021 | %change 1990-2021 |
|  | 240096 (168851,313374) | 594899 (362924,804914) | 1.48 (1.01,1.98) | 6.83 (4.37,9.32) | 7.21 (4.23,9.94) | 0.06 (-0.08,0.23) | 5666017 (4251059,7069738) | 12551752 (9489124,15451016) | 1.22 (0.91,1.66) | 144.72 (106.21,182.76) | 147.33 (109.06,183.45) | 0.02 (-0.1,0.21) |
| Sex | Males | 93613 (66086,120398) | 243060 (159715,323101) | 1.6 (1.2,2.07) | 5.97 (3.74,8.25) | 6.69 (3.98,9.3) | 0.12 (-0.04,0.29) | 2414649 (1794252,3011391) | 5646140 (4247052,6976635) | 1.34 (1.06,1.72) | 131.37 (96.12,166.66) | 142.25 (104.32,179.41) | 0.08 (-0.04,0.25) |
|  | Females | 146483 (97562,196210) | 351839 (201116,494197) | 1.4 (0.88,2) | 7.37 (4.6,10.12) | 7.53 (4.36,10.53) | 0.02 (-0.14,0.23) | 3251367 (2294581,4161209) | 6905612 (5009097,8756181) | 1.12 (0.75,1.67) | 154.37 (107.15,198.32) | 150.26 (109.6,190.15) | -0.03 (-0.17,0.21) |
| SDI | High SDI | 42339 (25102,57793) | 101715 (51587,144018) | 1.4 (0.91,1.7) | 3.88 (2.28,5.34) | 4.38 (2.59,5.87) | 0.13 (0.03,0.25) | 858426 (643921,1067628) | 1888250 (1342869,2367629) | 1.2 (0.94,1.45) | 79.52 (59.95,98.57) | 97.25 (76.46,115.81) | 0.22 (0.12,0.36) |
|  | High-middle SDI | 55916 (37393,74692) | 132675 (67107,191444) | 1.37 (0.7,1.88) | 6.62 (3.92,9.36) | 7 (3.38,10.17) | 0.06 (-0.17,0.25) | 1203848 (903408,1536884) | 2296315 (1583465,3023135) | 0.91 (0.52,1.32) | 127.41 (92.84,165.58) | 118.94 (81.23,157.67) | -0.07 (-0.22,0.11) |
|  | Middle SDI | 80183 (52533,106376) | 196805 (122494,276061) | 1.45 (0.96,2.25) | 9.61 (5.53,13.78) | 8.3 (4.53,12.23) | -0.14 (-0.29,0.1) | 1979473 (1355214,2590232) | 4255947 (3088318,5431403) | 1.15 (0.8,1.82) | 197.12 (132.36,261.86) | 163.33 (112.87,214.45) | -0.17 (-0.3,0.06) |
|  | Low-middle SDI | 41406 (28211,55455) | 113743 (81654,147945) | 1.75 (1.3,2.32) | 8.11 (5.03,11.49) | 8.96 (5.9,12.38) | 0.1 (-0.07,0.32) | 1064622 (740286,1387682) | 2774973 (2163092,3408019) | 1.61 (1.21,2.23) | 174.5 (122.01,231.14) | 192.73 (147.45,244.13) | 0.1 (-0.06,0.34) |
|  | Low SDI | 19835 (11275,27741) | 49041 (31965,64989) | 1.47 (1.01,2.36) | 10.04 (5.58,14.81) | 11.27 (6.94,15.88) | 0.12 (-0.09,0.49) | 550419 (306312,765530) | 1318232 (895030,1781084) | 1.39 (0.96,2.27) | 233.39 (132.99,326.55) | 249.65 (164.84,328.72) | 0.07 (-0.12,0.44) |
| GBD Region | Andean Latin America | 1094 (742,1481) | 2475 (1383,3575) | 1.26 (0.77,1.77) | 5.86 (3.68,8.28) | 4.38 (2.37,6.42) | -0.25 (-0.4,-0.1) | 26361 (20151,32833) | 51491 (36479,68298) | 0.95 (0.59,1.39) | 125.44 (93.2,159.74) | 87.42 (60.88,117.12) | -0.3 (-0.43,-0.16) |
|  | Australasia | 356 (204,509) | 838 (337,1224) | 1.36 (0.61,1.73) | 1.63 (0.85,2.38) | 1.34 (0.62,1.9) | -0.18 (-0.3,-0.08) | 6699 (4801,8677) | 13457 (8334,17818) | 1.01 (0.6,1.26) | 29.57 (20.8,38.89) | 24.32 (16.24,31) | -0.18 (-0.26,-0.1) |
|  | Caribbean | 1896 (1366,2466) | 5459 (3576,7226) | 1.88 (1.41,2.27) | 7.81 (5.33,10.44) | 9.98 (6.59,13.15) | 0.28 (0.11,0.44) | 47198 (36942,58825) | 124033 (94913,153885) | 1.63 (1.25,1.98) | 180.52 (138.74,228.31) | 230.58 (176.69,285.28) | 0.28 (0.1,0.46) |
|  | Central Asia | 3545 (2503,4646) | 7827 (5329,10301) | 1.21 (0.79,1.73) | 8.24 (5.49,11.12) | 11.36 (7.06,15.74) | 0.38 (0.09,0.7) | 85508 (68292,103807) | 177446 (135756,223717) | 1.08 (0.73,1.52) | 182.97 (142.27,227) | 225.17 (167.21,286.4) | 0.23 (0.02,0.48) |
|  | Central Europe | 16693 (11459,22125) | 34417 (18115,47345) | 1.06 (0.56,1.36) | 12.18 (7.52,16.66) | 14.52 (7.94,19.75) | 0.19 (0,0.31) | 341701 (266977,420820) | 576781 (392431,742466) | 0.69 (0.41,0.91) | 234.6 (179.04,292.21) | 256.77 (182.69,324.76) | 0.09 (-0.04,0.2) |
|  | Central Latin America | 5929 (4039,7927) | 12767 (7671,17935) | 1.15 (0.7,1.53) | 8.45 (5.15,11.79) | 5.4 (3.14,7.69) | -0.36 (-0.47,-0.25) | 130912 (103854,159737) | 248377 (179783,324940) | 0.9 (0.55,1.23) | 163.52 (120.71,206.61) | 101.12 (71.3,132.94) | -0.38 (-0.48,-0.28) |
|  | Central Sub-Saharan Africa | 3259 (1621,4943) | 11187 (6476,17053) | 2.43 (1.53,4.23) | 17.42 (8.38,27.05) | 26.46 (14.82,40.53) | 0.52 (0.11,1.24) | 89500 (45608,137883) | 291995 (171821,431335) | 2.26 (1.42,4) | 390.74 (195.43,580.93) | 546.75 (322.13,825.58) | 0.4 (0.05,1.09) |
|  | East Asia | 60550 (35297,84646) | 129831 (67188,204255) | 1.14 (0.43,2.38) | 9.53 (4.68,14.49) | 6.89 (3.18,11.52) | -0.28 (-0.49,0.07) | 1430316 (849323,1974447) | 2468556 (1553650,3558544) | 0.73 (0.25,1.75) | 180.32 (105.12,256.67) | 120.29 (72.71,178.97) | -0.33 (-0.5,0.01) |
|  | Eastern Europe | 6652 (5127,8086) | 15863 (10102,21120) | 1.38 (0.81,1.83) | 2.5 (1.86,3.13) | 4.49 (2.96,5.91) | 0.8 (0.5,1.03) | 168680 (139917,195265) | 312736 (239270,385024) | 0.85 (0.55,1.13) | 61.1 (50.73,70.84) | 90.73 (71.47,110.51) | 0.48 (0.29,0.66) |
|  | Eastern Sub-Saharan Africa | 8702 (4742,12349) | 19481 (11561,27470) | 1.24 (0.8,2.06) | 13.61 (7.08,19.8) | 13.95 (7.65,21.25) | 0.03 (-0.17,0.34) | 244965 (134295,342482) | 521322 (338086,709150) | 1.13 (0.73,1.93) | 311.7 (169.9,439.48) | 298.05 (180.48,414.03) | -0.04 (-0.22,0.3) |
|  | High-income Asia Pacific | 4662 (2307,7154) | 6724 (2088,11979) | 0.44 (-0.16,0.86) | 2.77 (1.18,4.44) | 1 (0.42,1.66) | -0.64 (-0.69,-0.54) | 87925 (58624,119645) | 93541 (44903,149938) | 0.06 (-0.28,0.41) | 47.35 (29.06,66.74) | 18.25 (11.86,25.8) | -0.61 (-0.66,-0.5) |
|  | High-income North America | 13621 (9177,17789) | 44695 (28218,58029) | 2.28 (1.85,2.72) | 3.9 (2.73,5.02) | 6.81 (4.69,8.59) | 0.74 (0.57,0.97) | 318549 (254229,382521) | 983533 (778733,1178286) | 2.09 (1.79,2.48) | 95.99 (77.8,113.6) | 172.21 (142.82,201.13) | 0.79 (0.62,1.02) |
|  | North Africa and Middle East | 35436 (24345,47300) | 85253 (57659,110088) | 1.41 (0.93,2.12) | 26.35 (15.88,36.47) | 23.2 (14.02,31.44) | -0.12 (-0.29,0.11) | 845482 (596104,1089020) | 1910275 (1455255,2382733) | 1.26 (0.8,1.98) | 522.42 (363.93,686.68) | 440.2 (317.57,558.72) | -0.16 (-0.32,0.09) |
|  | Oceania | 311 (201,434) | 683 (479,996) | 1.2 (0.69,2.03) | 11.36 (7.24,16.17) | 9.27 (6.25,13.18) | -0.18 (-0.35,0.09) | 9812 (6241,13922) | 21673 (14664,31794) | 1.21 (0.67,2.1) | 290.91 (188.24,402.99) | 243.69 (171.23,353.9) | -0.16 (-0.35,0.15) |
|  | South Asia | 14746 (8200,21658) | 61433 (40106,90559) | 3.17 (2.01,5.51) | 3.03 (1.56,4.88) | 4.73 (2.81,7.34) | 0.56 (0.14,1.44) | 399107 (230380,577004) | 1490183 (1049058,2077926) | 2.73 (1.68,4.83) | 67.92 (38.4,98.92) | 101.32 (70.52,143.72) | 0.49 (0.09,1.32) |
|  | Southeast Asia | 13602 (8334,18952) | 43048 (29946,57024) | 2.16 (1.59,3.26) | 5.7 (3.36,8.2) | 6.97 (4.62,9.6) | 0.22 (0,0.61) | 388646 (235386,525913) | 1159653 (809395,1490326) | 1.98 (1.46,3.07) | 141.2 (86.26,193.98) | 168.45 (118.2,217.74) | 0.19 (-0.02,0.62) |
|  | Southern Latin America | 3502 (2278,4659) | 7116 (3480,10123) | 1.03 (0.42,1.34) | 8.15 (4.96,11.09) | 7.75 (3.88,10.95) | -0.05 (-0.26,0.06) | 71894 (55357,88611) | 115625 (75591,149422) | 0.61 (0.28,0.8) | 158.65 (118.36,198.15) | 129.88 (86.97,166.68) | -0.18 (-0.3,-0.1) |
|  | Southern Sub-Saharan Africa | 4449 (3187,5890) | 13652 (9929,17284) | 2.07 (1.69,2.5) | 18.43 (11.7,25.51) | 28.4 (17.52,37.54) | 0.54 (0.33,0.77) | 116312 (95260,146331) | 328748 (265705,399280) | 1.83 (1.5,2.19) | 412.08 (317.08,535.7) | 578.12 (437.99,722.53) | 0.4 (0.24,0.59) |
|  | Tropical Latin America | 8417 (6357,10542) | 17129 (10978,22648) | 1.04 (0.64,1.36) | 10.36 (7.02,13.75) | 6.9 (4.29,9.26) | -0.33 (-0.42,-0.25) | 216908 (178699,256744) | 366921 (286760,442702) | 0.69 (0.48,0.9) | 231.5 (183.38,281.97) | 143.42 (110.18,174.44) | -0.38 (-0.44,-0.31) |
|  | Western Europe | 23441 (11486,34450) | 52473 (16490,84212) | 1.24 (0.3,1.63) | 3.94 (1.93,5.81) | 4.11 (1.5,6.37) | 0.04 (-0.26,0.17) | 390360 (248712,526128) | 667214 (285609,993373) | 0.71 (0.12,1.02) | 66.72 (44.26,88.38) | 59.46 (31.29,83.16) | -0.11 (-0.29,-0.01) |
|  | Western Sub-Saharan Africa | 9233 (6019,12929) | 22547 (13463,30630) | 1.44 (0.61,2.25) | 11.76 (7.05,17.59) | 13.03 (7.79,18.62) | 0.11 (-0.26,0.48) | 249180 (165152,341063) | 628194 (371114,822109) | 1.52 (0.67,2.37) | 272.01 (178,372.99) | 296.3 (180.82,399.61) | 0.09 (-0.27,0.44) |

**Table S5. Temporal trends of the ASMR of HHD attributed to high BMI by Sex/SDI/GBD region from 1990 to 2021.**

| Sex/SDI/GBD region |  | Trend 1 (1990-2000) | | Trend 2 (2000-2010) | | Trend 3 (2010-2021) | |
| --- | --- | --- | --- | --- | --- | --- | --- |
|  |  | APC(ASMR) | APC(ASDR) | APC(ASMR) | APC(ASDR) | APC(ASMR) | APC(ASDR) |
| Global |  | -0.01 (-0.06,0.04) | -0.02 (-0.07,0.04) | 0.04 (-0.02,0.1) | 0.02 (-0.03,0.08) | 0.02 (-0.06,0.11) | 0.02 (-0.06,0.12) |
| Sex | Male | 0.01 (-0.06,0.08) | 0 (-0.06,0.08) | 0.06 (-0.01,0.13) | 0.05 (-0.02,0.11) | 0.05 (-0.03,0.15) | 0.04 (-0.04,0.13) |
|  | Female | -0.02 (-0.07,0.05) | -0.03 (-0.09,0.04) | 0.03 (-0.05,0.09) | -0.01 (-0.07,0.07) | 0.01 (-0.09,0.12) | 0.01 (-0.08,0.14) |
| SDI | High SDI | -0.06 (-0.12,-0.02) | -0.06 (-0.09,-0.02) | 0.11 (0.08,0.15) | 0.18 (0.14,0.23) | 0.08 (0.02,0.15) | 0.1 (0.04,0.18) |
|  | High-middle SDI | 0.09 (0.02,0.18) | 0.07 (0,0.17) | 0.1 (-0.02,0.17) | 0.02 (-0.07,0.08) | -0.11 (-0.2,-0.04) | -0.14 (-0.22,-0.07) |
|  | Middle SDI | -0.12 (-0.2,-0.01) | -0.13 (-0.21,-0.01) | -0.05 (-0.12,0.03) | -0.07 (-0.13,0) | 0.03 (-0.1,0.19) | 0.02 (-0.09,0.17) |
|  | Low-middle SDI | 0.01 (-0.06,0.07) | 0.02 (-0.04,0.09) | 0.05 (-0.02,0.12) | 0.04 (-0.03,0.11) | 0.04 (-0.06,0.19) | 0.04 (-0.06,0.18) |
|  | Low SDI | 0.05 (-0.04,0.14) | 0.04 (-0.05,0.13) | -0.02 (-0.11,0.11) | -0.04 (-0.13,0.11) | 0.1 (-0.03,0.28) | 0.08 (-0.05,0.26) |
| GBD Region | Andean Latin America | -0.17 (-0.26,-0.07) | -0.19 (-0.27,-0.1) | 0.33 (0.18,0.51) | 0.34 (0.19,0.49) | -0.33 (-0.44,-0.21) | -0.36 (-0.46,-0.25) |
|  | Australasia | -0.22 (-0.3,-0.15) | -0.23 (-0.28,-0.18) | 0 (-0.11,0.08) | -0.03 (-0.09,0.03) | 0.05 (-0.02,0.15) | 0.1 (0.04,0.18) |
|  | Caribbean | -0.1 (-0.16,-0.03) | -0.07 (-0.13,-0.01) | 0.24 (0.13,0.33) | 0.2 (0.1,0.28) | 0.15 (0.03,0.29) | 0.15 (0.02,0.29) |
|  | Central Asia | 0.36 (0.2,0.52) | 0.39 (0.26,0.52) | 0.36 (0.21,0.51) | 0.24 (0.12,0.37) | -0.26 (-0.38,-0.14) | -0.29 (-0.4,-0.17) |
|  | Central Europe | 0.04 (-0.02,0.09) | 0.02 (-0.03,0.06) | 0.28 (0.18,0.34) | 0.23 (0.15,0.28) | -0.1 (-0.19,-0.04) | -0.12 (-0.2,-0.05) |
|  | Central Latin America | -0.2 (-0.24,-0.17) | -0.22 (-0.25,-0.19) | -0.17 (-0.23,-0.14) | -0.2 (-0.24,-0.17) | -0.03 (-0.17,0.11) | -0.01 (-0.15,0.14) |
|  | Central Sub-Saharan Africa | 0.18 (0,0.42) | 0.15 (-0.01,0.39) | 0.13 (-0.07,0.4) | 0.09 (-0.11,0.36) | 0.15 (-0.08,0.46) | 0.11 (-0.11,0.39) |
|  | East Asia | -0.22 (-0.34,-0.04) | -0.25 (-0.36,-0.06) | -0.15 (-0.28,-0.01) | -0.18 (-0.3,-0.04) | 0.1 (-0.14,0.37) | 0.09 (-0.14,0.37) |
|  | Eastern Europe | 1.06 (0.95,1.16) | 1.04 (0.94,1.15) | 0.32 (0.19,0.4) | 0.16 (0.08,0.21) | -0.34 (-0.4,-0.28) | -0.37 (-0.42,-0.31) |
|  | Eastern Sub-Saharan Africa | -0.01 (-0.1,0.12) | -0.02 (-0.11,0.13) | -0.03 (-0.13,0.12) | -0.07 (-0.17,0.1) | 0.06 (-0.05,0.2) | 0.05 (-0.07,0.19) |
|  | High-income Asia Pacific | -0.58 (-0.61,-0.54) | -0.55 (-0.58,-0.49) | -0.19 (-0.27,-0.09) | -0.21 (-0.26,-0.12) | 0.06 (-0.04,0.16) | 0.08 (0.01,0.16) |
|  | High-income North America | 0.12 (0.05,0.17) | 0.13 (0.09,0.17) | 0.25 (0.21,0.31) | 0.34 (0.3,0.38) | 0.25 (0.14,0.35) | 0.19 (0.1,0.29) |
|  | North Africa and Middle East | -0.13 (-0.21,-0.01) | -0.13 (-0.2,-0.01) | -0.03 (-0.11,0.04) | -0.05 (-0.12,0.02) | 0.05 (-0.08,0.17) | 0.01 (-0.11,0.15) |
|  | Oceania | -0.06 (-0.18,0.08) | -0.05 (-0.19,0.11) | -0.1 (-0.2,0.03) | -0.08 (-0.2,0.06) | -0.04 (-0.19,0.15) | -0.04 (-0.2,0.15) |
|  | South Asia | 0.14 (0,0.37) | 0.14 (0.01,0.38) | 0.2 (0.03,0.46) | 0.17 (0.01,0.41) | 0.14 (-0.03,0.37) | 0.11 (-0.05,0.33) |
|  | Southeast Asia | 0.1 (-0.01,0.25) | 0.1 (-0.02,0.24) | 0.06 (-0.04,0.18) | 0.05 (-0.05,0.18) | 0.05 (-0.09,0.22) | 0.04 (-0.1,0.22) |
|  | Southern Latin America | 0 (-0.13,0.08) | -0.08 (-0.16,-0.02) | 0.11 (0.02,0.18) | 0.06 (-0.01,0.12) | -0.14 (-0.2,-0.09) | -0.16 (-0.2,-0.11) |
|  | Southern Sub-Saharan Africa | 0.52 (0.22,0.75) | 0.43 (0.17,0.62) | 0.17 (0.1,0.25) | 0.16 (0.08,0.24) | -0.13 (-0.25,0.02) | -0.15 (-0.25,0.02) |
|  | Tropical Latin America | -0.09 (-0.14,-0.04) | -0.12 (-0.15,-0.08) | -0.05 (-0.11,0) | -0.09 (-0.13,-0.06) | -0.23 (-0.29,-0.18) | -0.23 (-0.28,-0.17) |
|  | Western Europe | 0.03 (-0.13,0.1) | -0.06 (-0.16,0) | 0.08 (-0.05,0.13) | 0.04 (-0.06,0.08) | -0.07 (-0.12,-0.03) | -0.09 (-0.13,-0.05) |
|  | Western Sub-Saharan Africa | 0.16 (-0.14,0.41) | 0.16 (-0.13,0.4) | -0.1 (-0.24,0.09) | -0.1 (-0.24,0.08) | 0.06 (-0.1,0.35) | 0.05 (-0.12,0.35) |
